# Supplementary material for: Homojunction Sb2Se3 Solar Cell
Source: Research Square preprint supplement (doi:10.21203/rs.3.rs-7257351/v1), 2025-08-22
Supplement: Supplementary file 1 [file 2a1f3f9cc3f24949ab231de8.docx]

Supplementary information

**Homojunction Sb2Se3 Solar Cell**

*Junjie Yang,1 Jianyu Li, 1 Shuwei Sheng,1 Zhiyuan Cai,1 Ke Li,3 Zichen Ruan,1 Bo Che,1 Rongfeng Tang,1* andTao Chen1,2**

1 Department of Materials Science and Engineering, School of Chemistry and Materials Science, Hefei National Research Center for Physical Sciences at the Microscale, University of Science and Technology of China, Hefei, Anhui 230026, P. R. China.

2 Institute of Deep Space Sciences, Deep Space Exploration Laboratory, Hefei 230088, P. R. China.

3 Institute of Optoelectronic Materials and Devices, School of Materials Science and Engineering, Jiangxi University of Science and Technology, Ganzhou 341000, P. R. China.

***E-mail: rftang@ustc.edu.cn; tchenmse@ustc.edu.cn

CONTENTS

**Figures**

Figure S1. Micro-structure, crystallinity, and chemical composition analysis.

Figure S2. XPS spectra of Sb 3*d* and Se 3*d* and element proportion of Sb2Se3 films with various Se/Sb ratio.

Figure S3. Cross-sectional SEM images and the elemental content results of SEM-EDS.

Figure S4. Elemental content of the Control-Sb2Se3 and p-type Sb2Se3 of Target-Sb2Se3 from ICP-AES.

Figure S5. SIMS profile for the Control-Sb2Se3 and Target-Sb2Se3 films.

Figure S6. Calculated formation energy the intrinsic defects under the Sb-rich condition.

Figure S7. Calculated formation energy the intrinsic defects under the Se-rich condition.

Figure S8. Effect of the stoichiometric ratio of Sb2Se3 on the photovoltaic performance of single-layer Sb2Se3 solar cells.

Figure S9. The optimal performance of the different Sb2Se3 stoichiometric ratio of single-layer Sb2Se3 solar cells.

Figure S10. The carrier lifetime from TAS tests for the Sb2Se3 films with different Se/Sb ratio on the glass.

Figure S11. Effect of the thickness of n-Sb2Se3 layer on the photovoltaic performance of the homojunction Sb2Se3 solar cells.

Figure S12. The optimal performance of the different thickness of n-Sb2Se3 layer of homojunction Sb2Se3 solar cells.

Figure S13. Electrical behaviors of the Control-Sb2Se3 and Target-Sb2Se3 devices.

Figure S14. The Arrhenius plots are obtained from DLTS signals of the Control-Sb2Se3 and Target-Sb2Se3 devices.

Figure S15. DLTS spectra for the single-layer p-type Sb2Se3 device.

Figure S16. Electrical properties of the Sb2Se3 films with different Se/Sb ratio.

Figure S17. Simulated *J-V* curves of the Control-Sb2Se3 and Target-Sb2Se3 devices.

Figure S18. Interface structure analysis and TEM-EDS line scan along the depth of the Target-Sb2Se3 device.

**Tables**

Table S1. Effect of the stoichiometric ratio of Sb2Se3 on the photovoltaic performance of single-layer Sb2Se3 solar cells.

Table S2. Effect of the thickness of n- Sb2Se3 layer on the photovoltaic performance of the homojunction Sb2Se3 solar cells.

Table S3. The summarized PCEs of related researches on Sb2Se3 solar cells prepared by thermal evaporation method.

Table S4. The chemical potentials of the elements.

Table S5. The results of DLCP and C-V characterization.

Table S6. The Fitting results of TAS for the Sb2Se3 films with different Se/Sb ratio on the glass.

Table S7. Charge extraction characteristic of the FTO/CdS/Control- Sb2Se3 device and FTO/CdS/Target- Sb2Se3 device.

Table S8. Summarized defect information obtained from DLTS characterizations

Table S9. Summarized defect information obtained from DLTS characterizations of single p-type Sb2Se3.

**Supplementary Notes**

Supplementary Note 1: Micro-structure, crystallinity, and chemical composition analysis.

Supplementary Note 2: First-principles calculations.

Supplementary Note 3: The optimization of the composition and thickness.

Supplementary Note 4: Texture coefficient calculations.

Supplementary Note 5: Background of DLTS measurement.

**References**


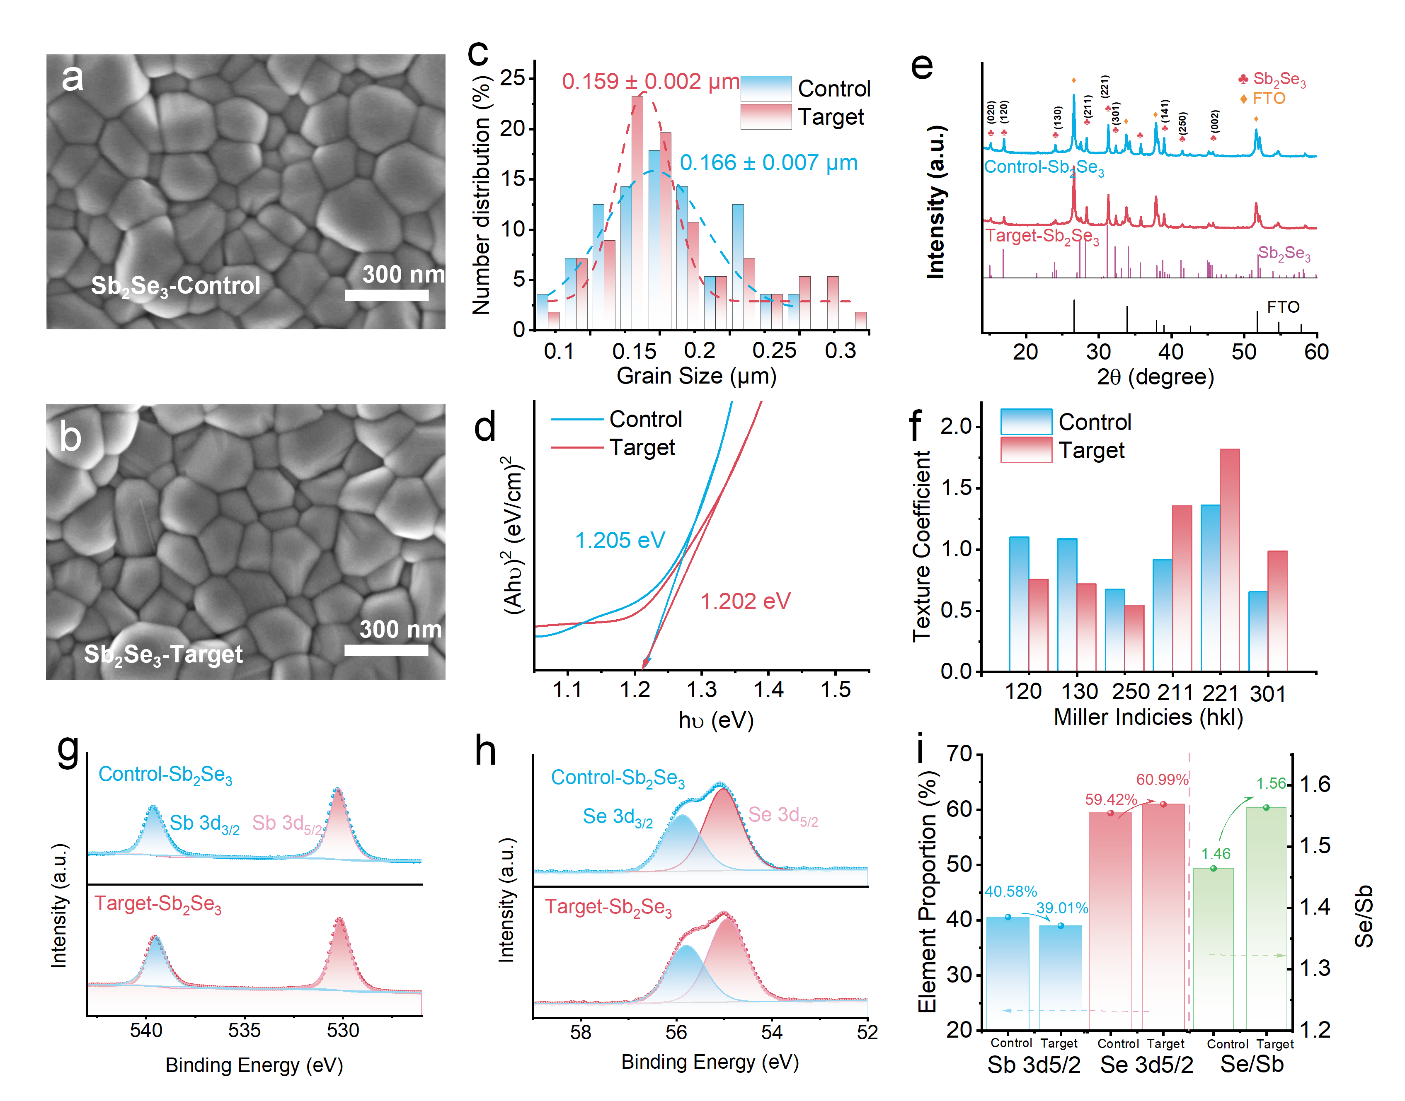


**Figure S1. Micro-structure, crystallinity, and chemical composition analysis.** a, b) SEM images of Control-Sb2Se3 film and Target-Sb2Se3 film. c, d) Grain size distributions and Tauc plot of Control-Sb2Se3 and Target-Sb2Se3 films. e, f) XRD patterns and texture coefficient of Control-Sb2Se3 and Target-Sb2Se3 films. g-i) High-resolution core spectra of Sb 3d and Se 3d, and element proportion of Sb and Se elements and Se/Sb ratio of Control-Sb2Se3 and Target-Sb2Se3 films.


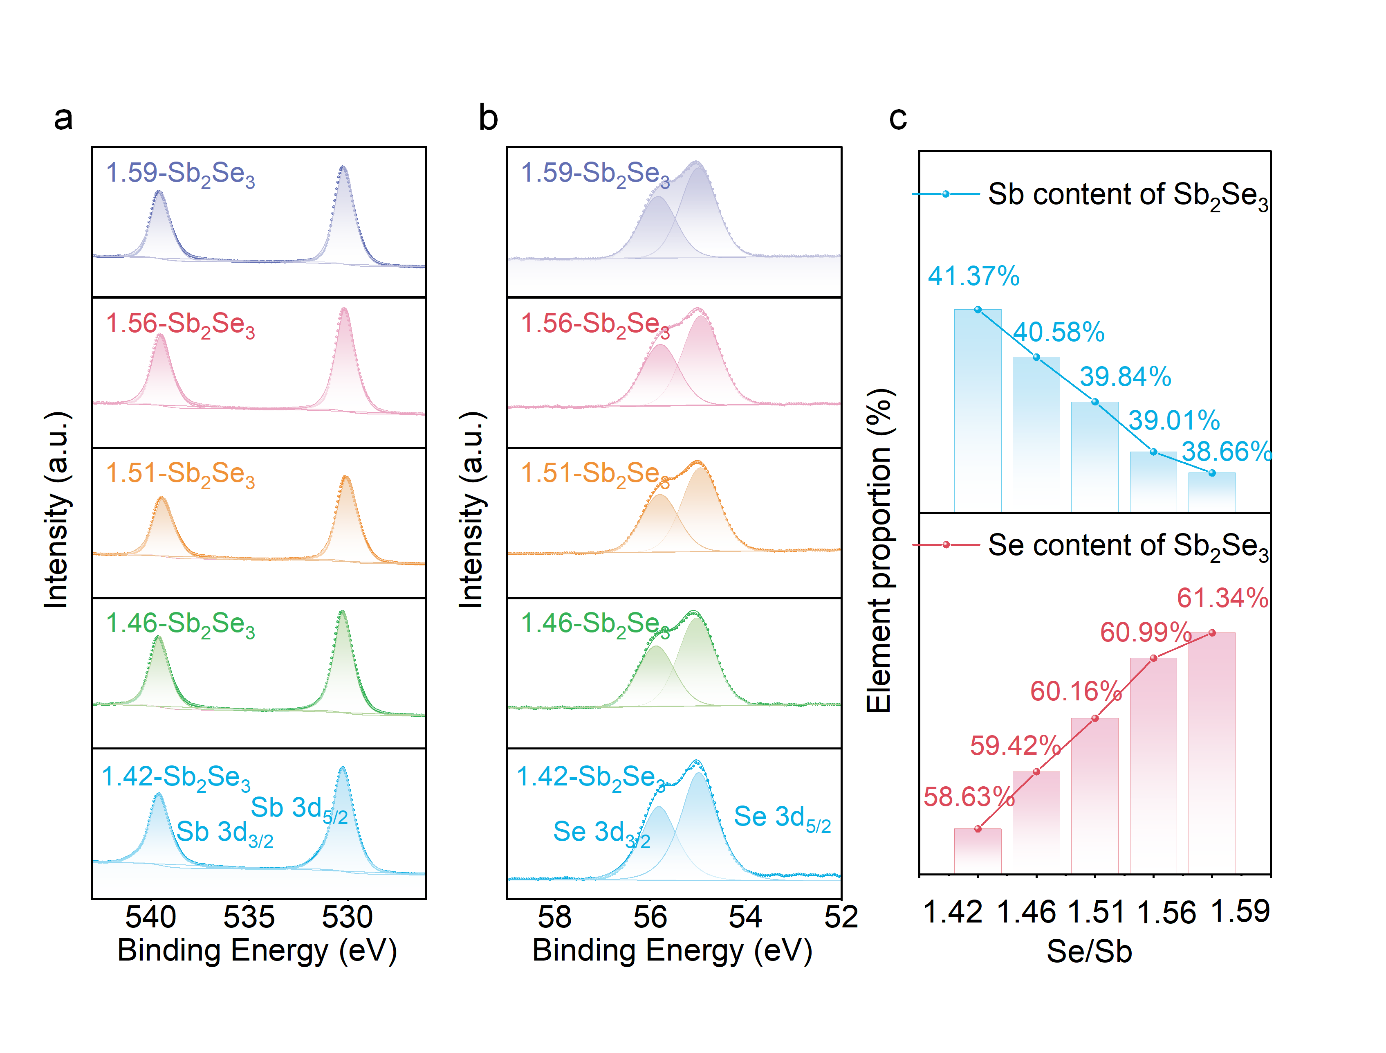


**Figure S2.** a, b) High-resolution core spectra of Sb 3*d* and Se 3*d*, and c) element proportion of Sb and Se elements and Se/Sb ratio of Sb2Se3 films with various Se/Sb ratio.


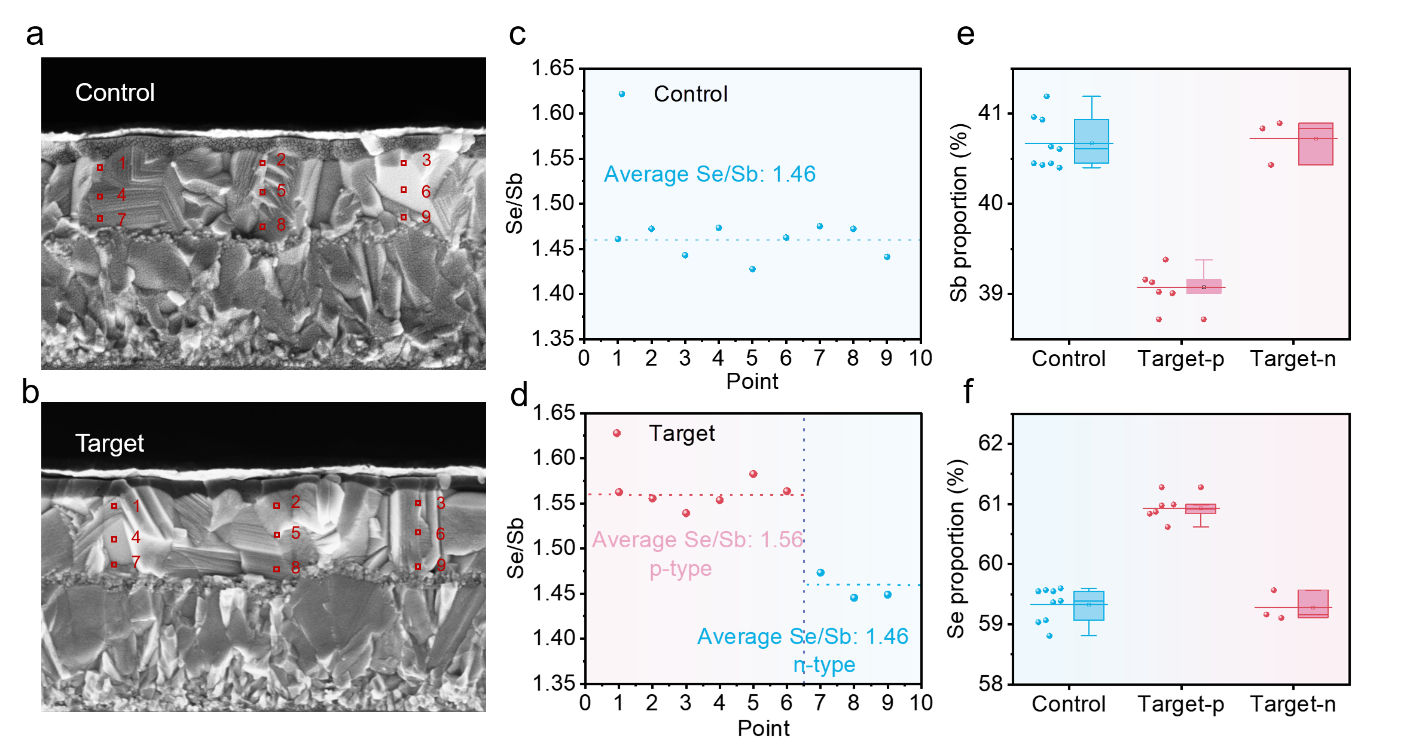


**Figure S3.** a, b) Cross-sectional SEM images and the positions of EDS of the Control and Target Sb2Se3 solar cells. c-d) The EDS results for the Control-Sb2Se3 and Target-Sb2Se3 devices.


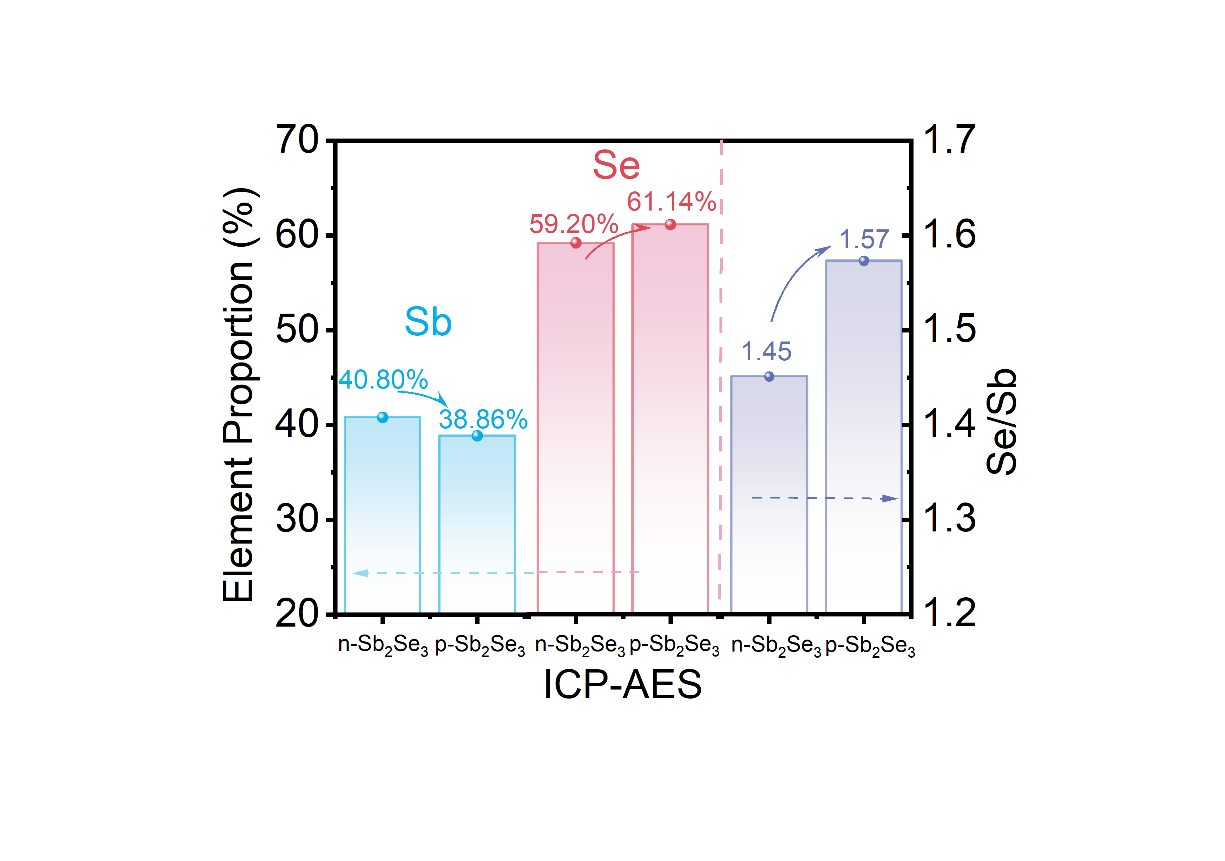


**Figure S4.** Elemental content of the Control-Sb2Se3 and p-type Sb2Se3 of Target-Sb2Se3 from inductively coupled plasma atomic emission spectroscopy (ICP-AES).

**
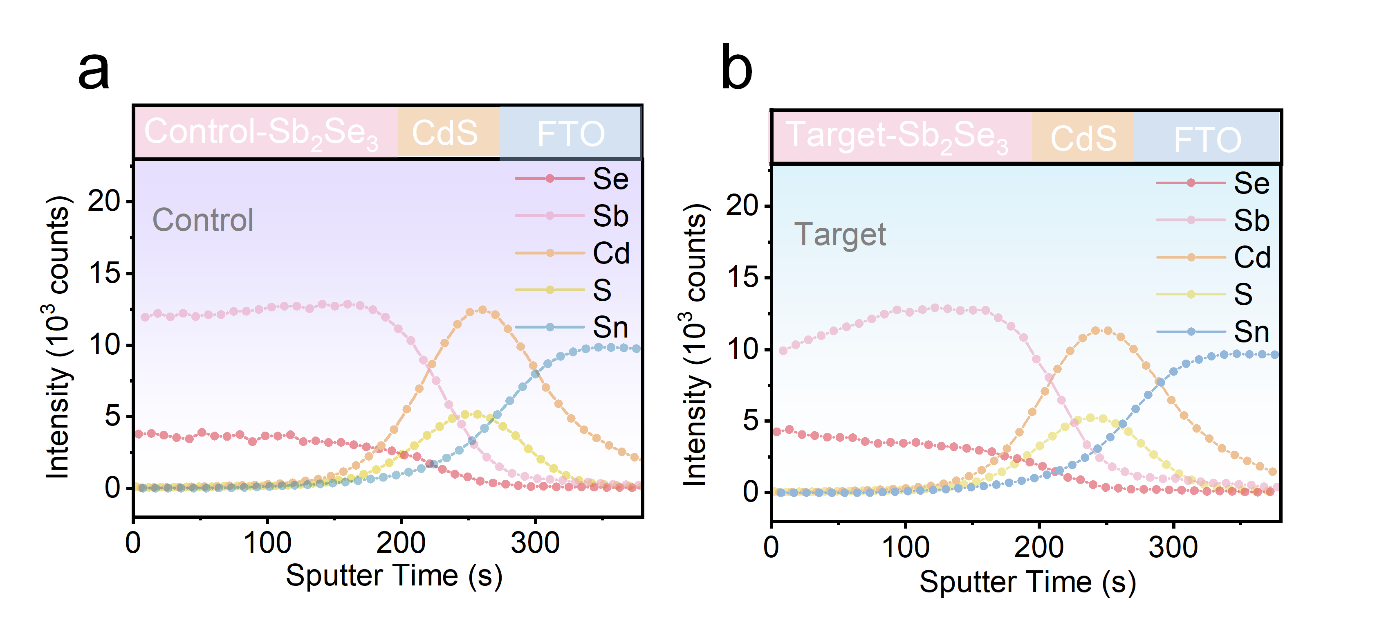
**

**Figure S5.** SIMS profile for the Control-Sb2Se3 and Target-Sb2Se3 films.


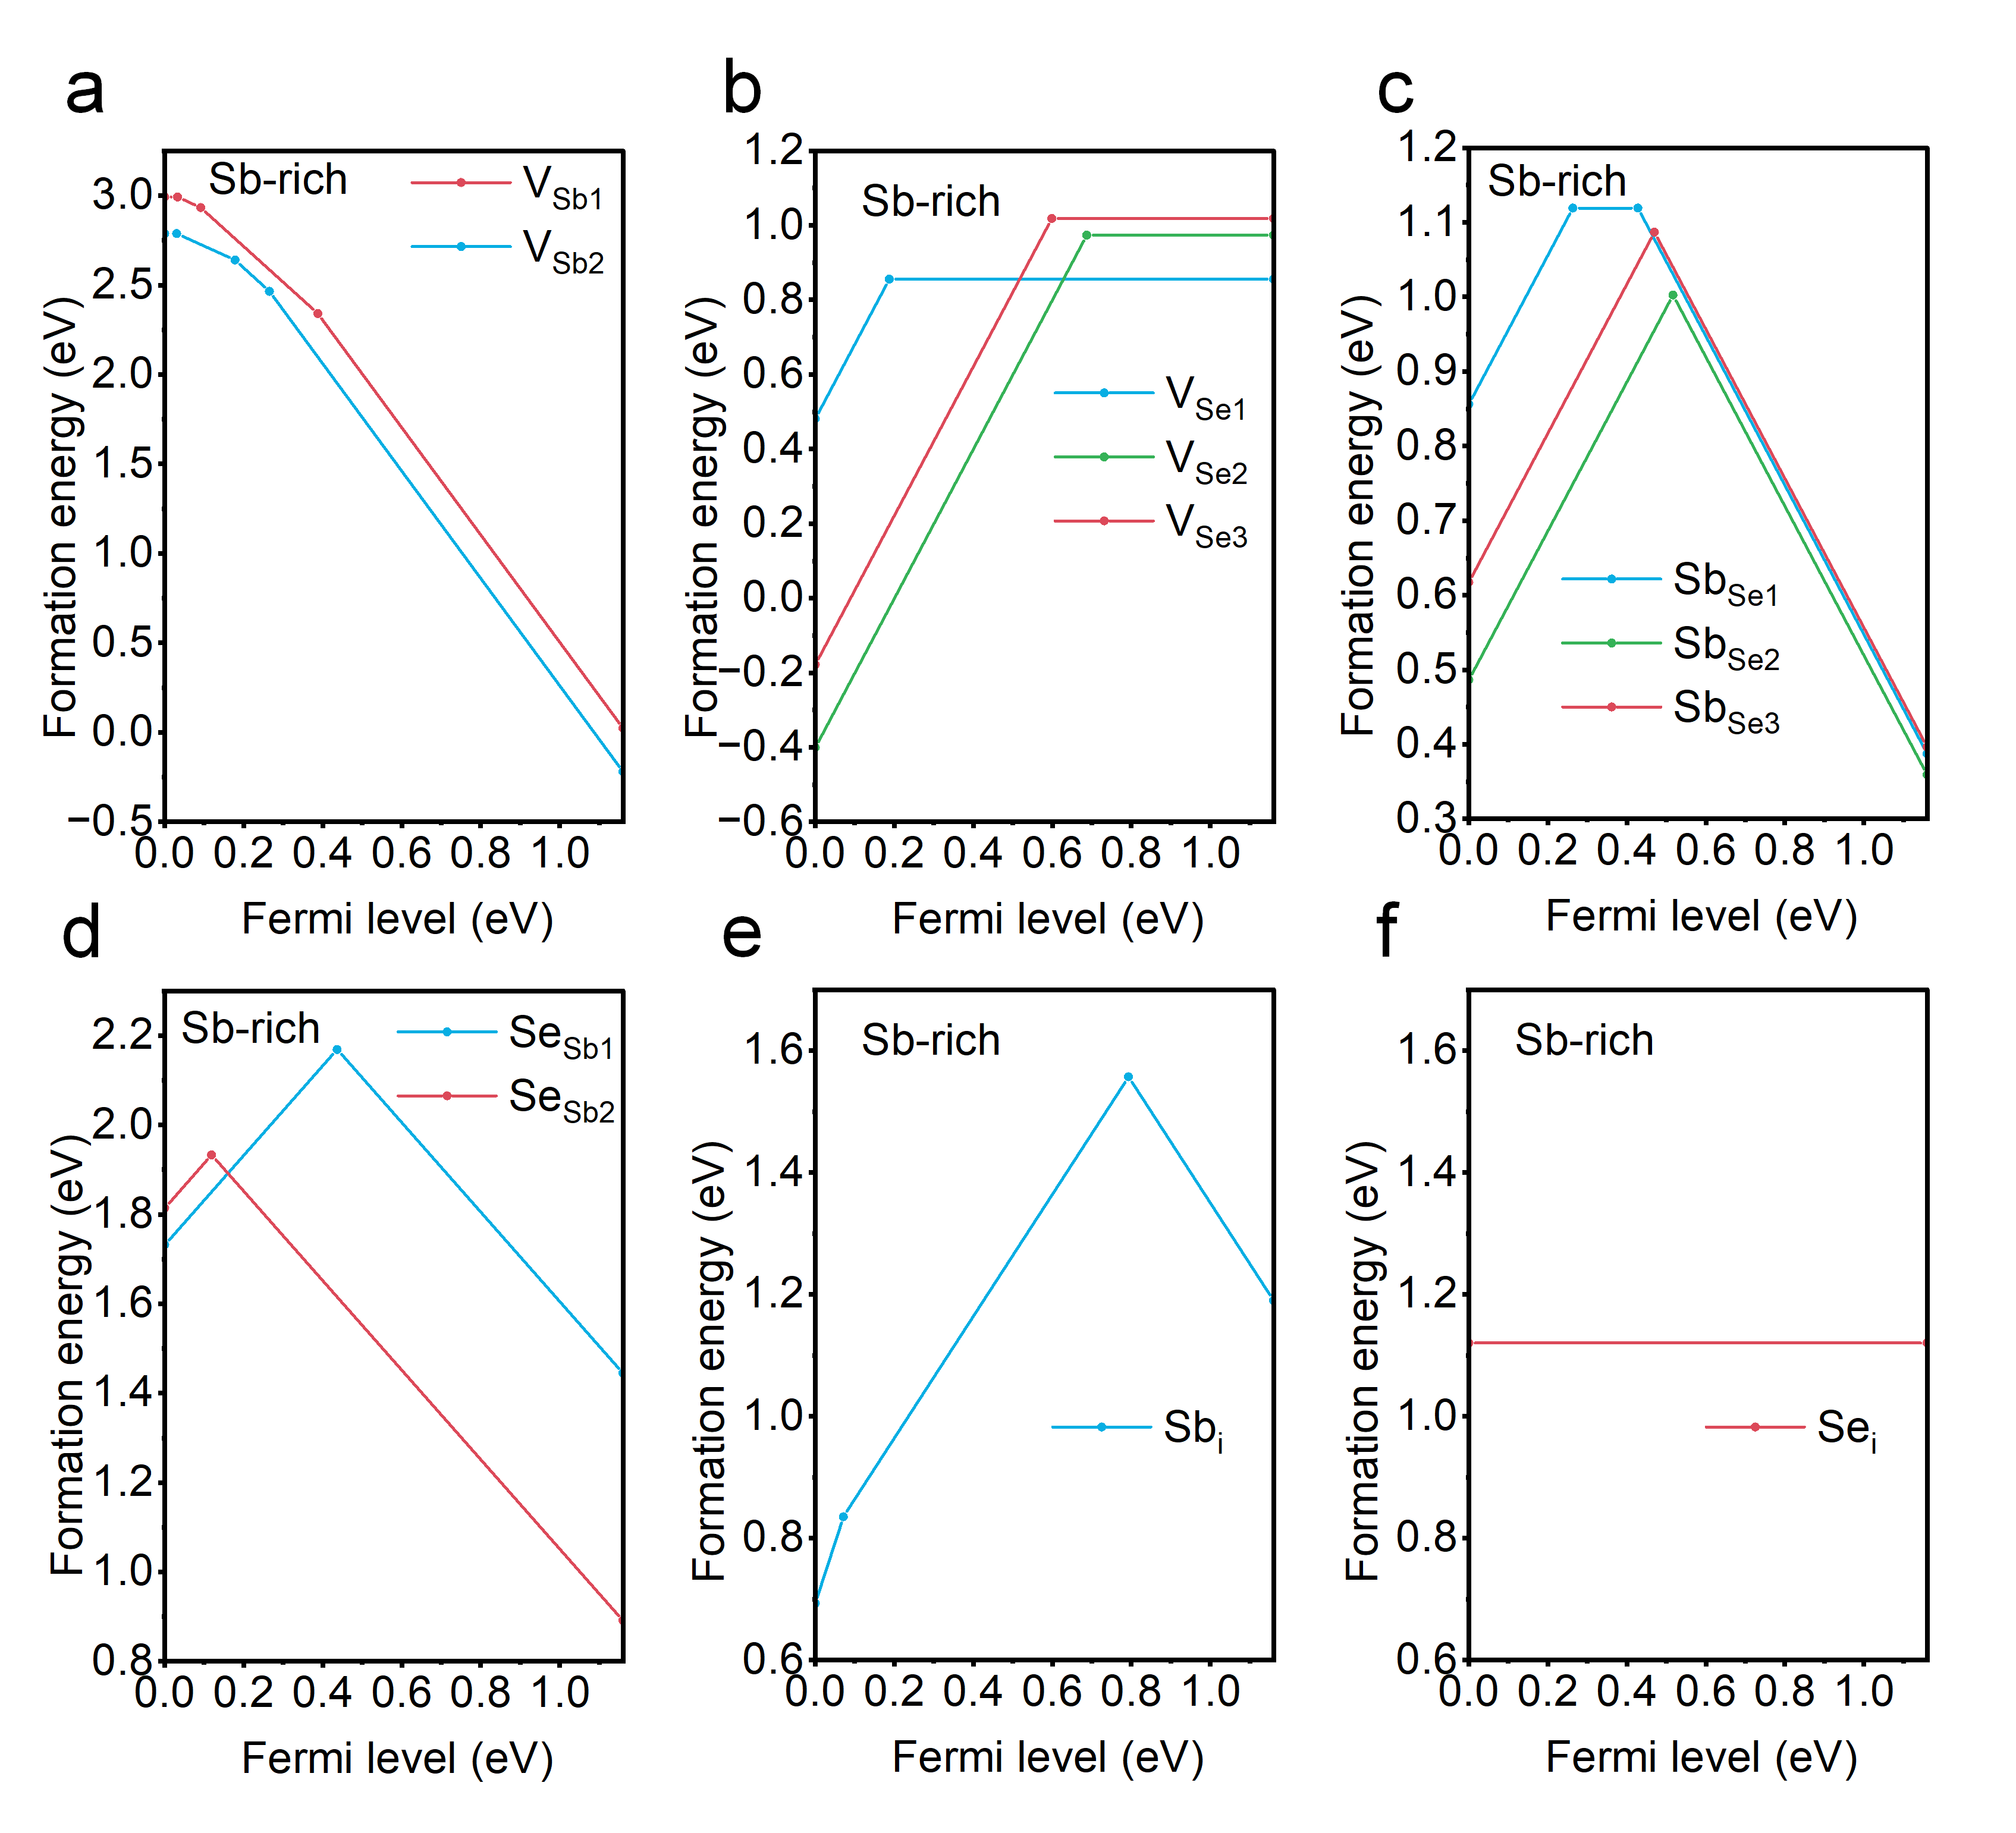


**Figure S6. Calculated formation energy the intrinsic defects.** a) VSb, b) VSe, c) SbSe, d) SeSb, e) Sbi, and f) Sei as a function of Fermi level in Sb2Se3 under the Sb-rich condition.


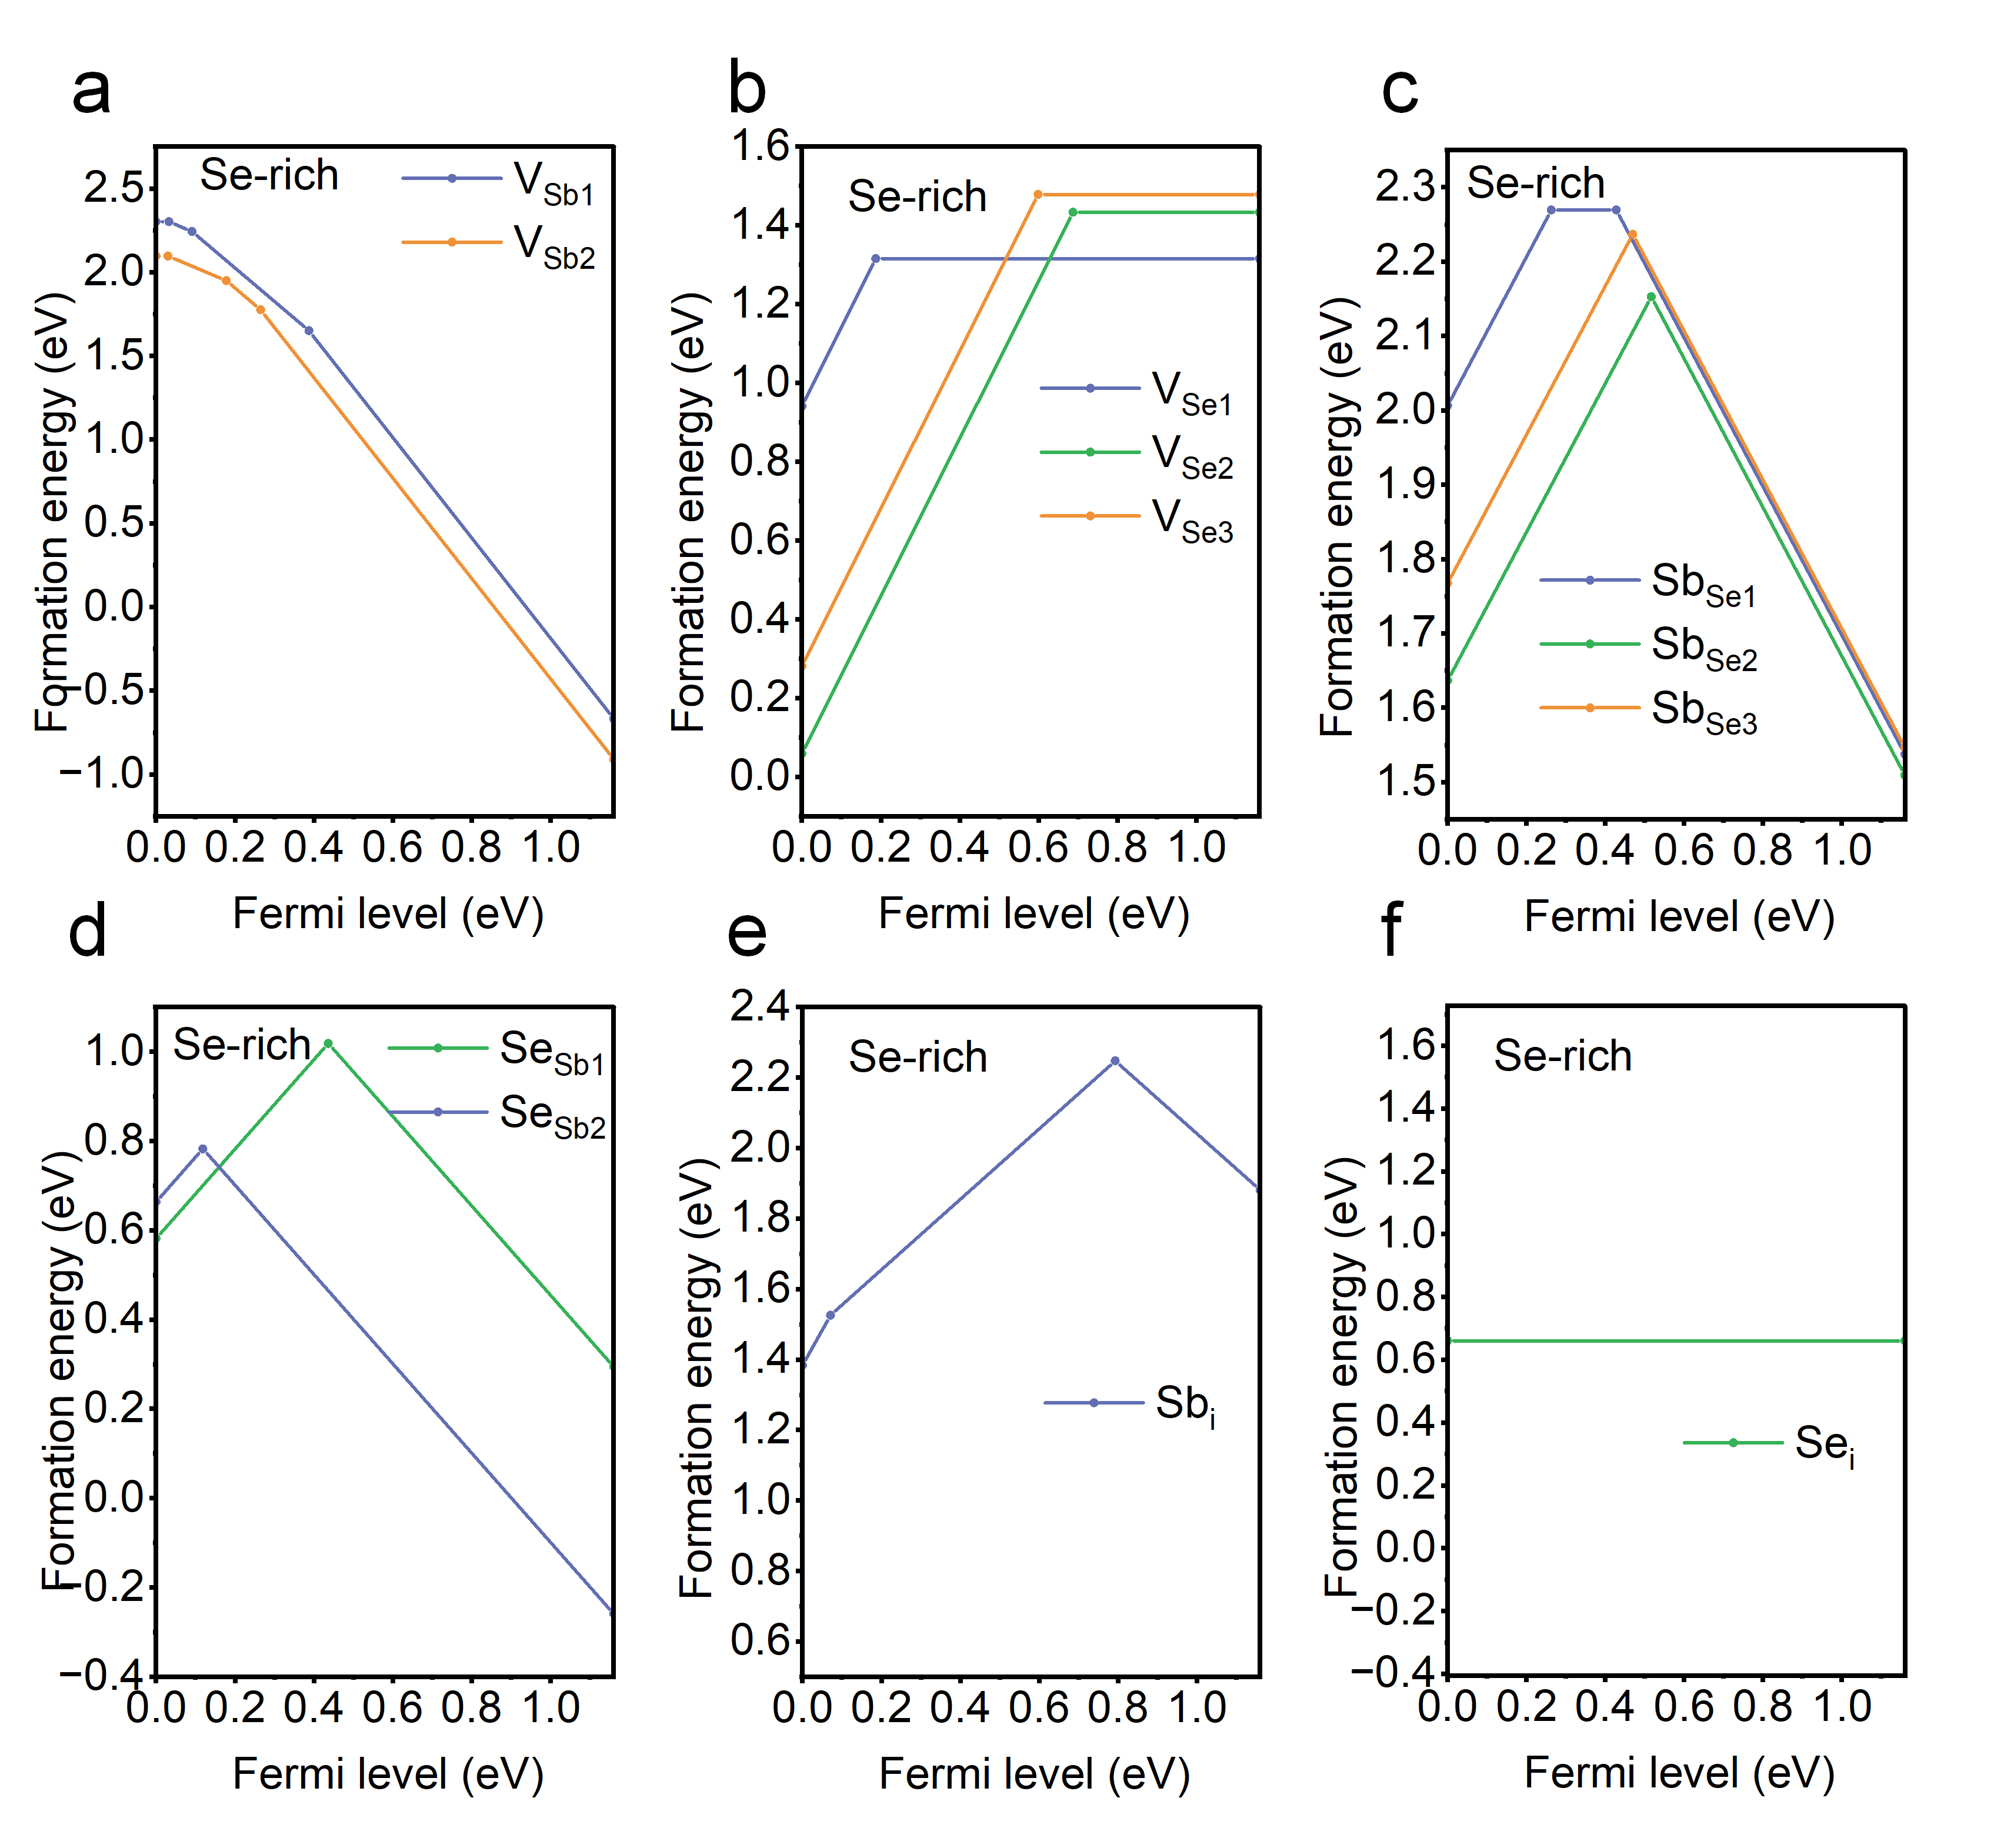


**Figure S7. Calculated formation energy the intrinsic defects.** a) VSb, b) VSe, c) SbSe, d) SeSb, e) Sbi, and f) Sei as a function of Fermi level in Sb2Se3 under the Se-rich condition.

**Note S3** The optimization of the composition and thickness of the p-type and n-type layer:

The optimal PV performance was obtained with a composition of Se/Sb 1.56 for the p-type layer and a thickness of 50 nm for the n-type layer.

**
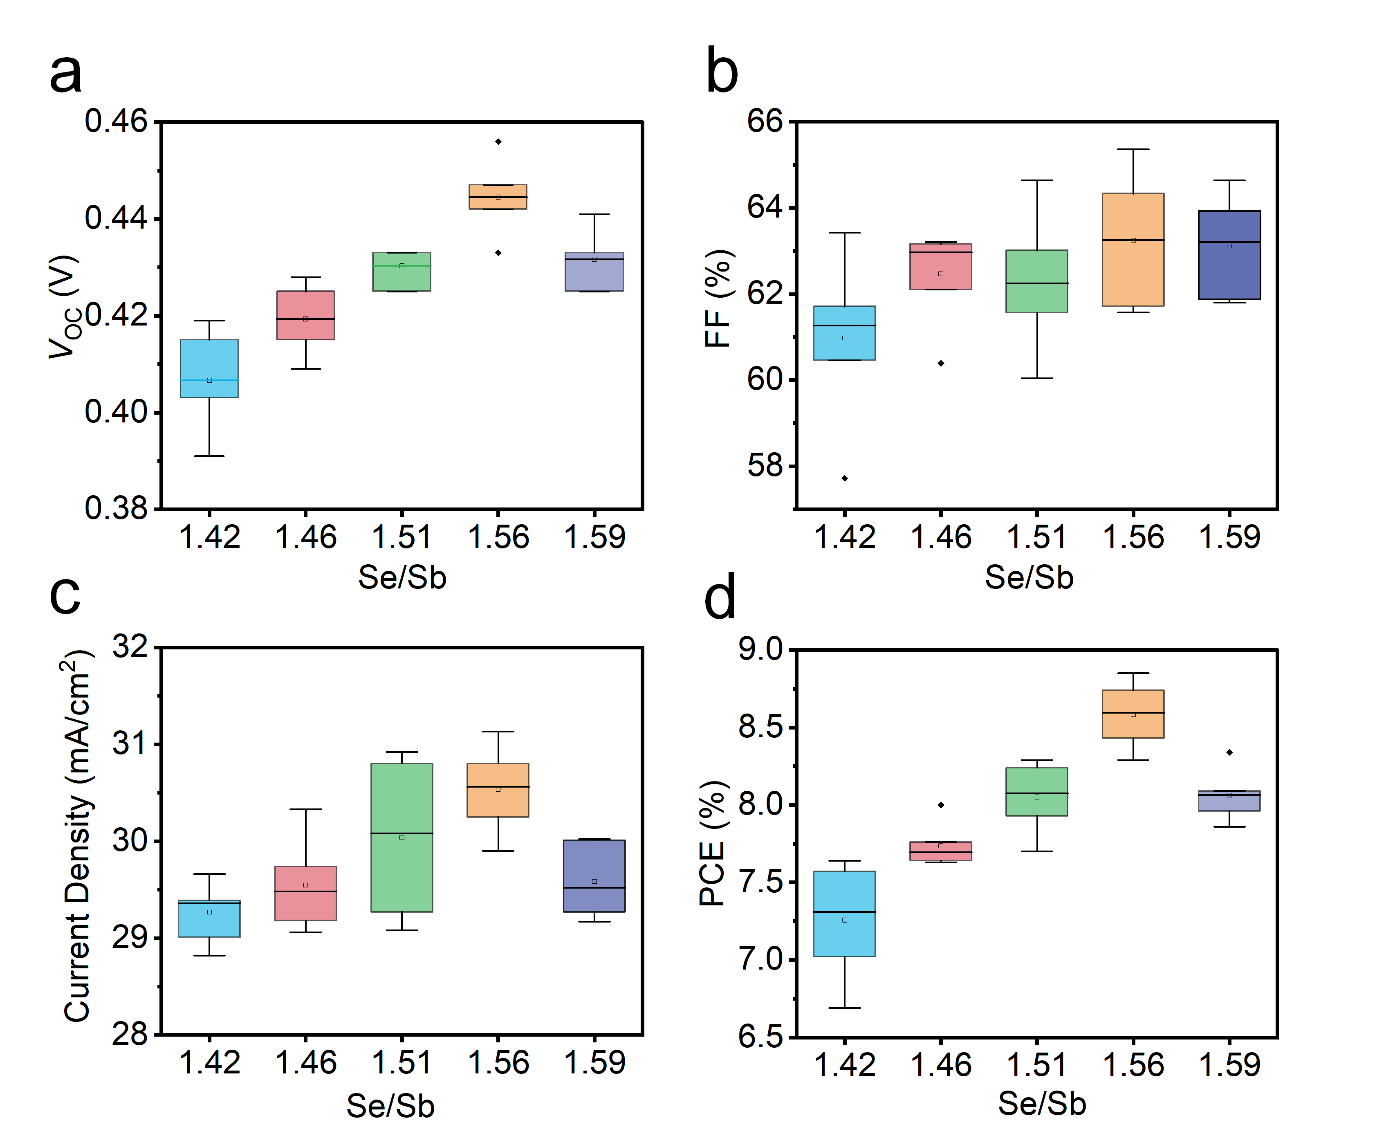
**

**Figure S8.** Effect of the stoichiometric ratio of Sb2Se3 on the photovoltaic performance of single-layer Sb2Se3 solar cells. Statistics of the a) *V*OC, b) FF, c) *J*SC, and d) PCE of the devices.

**
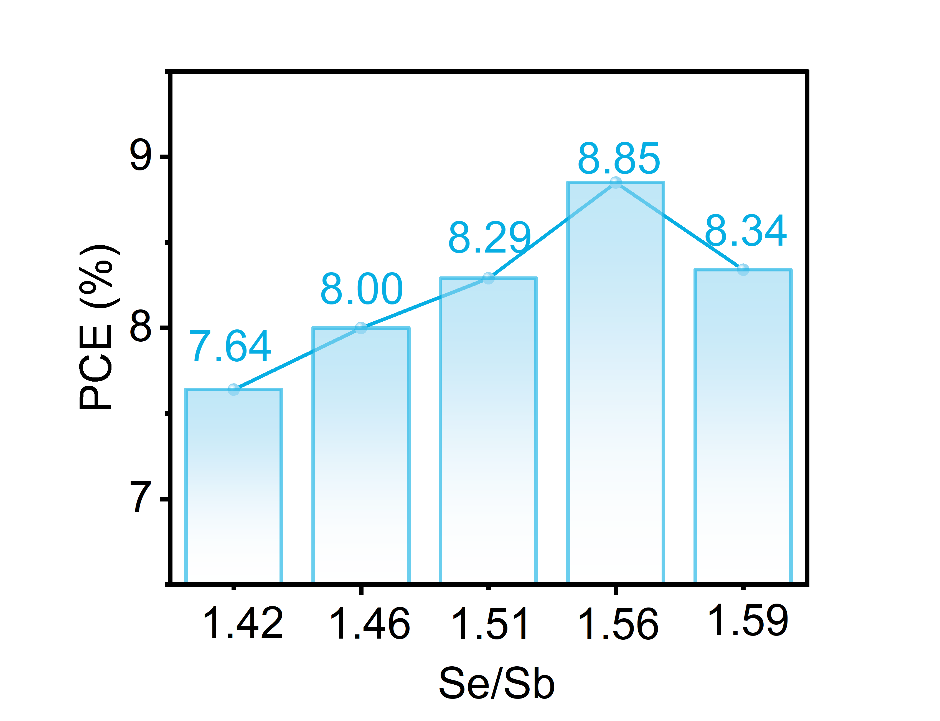
**

**Figure S9.** Effect of the stoichiometric ratio of Sb2Se3 on the photovoltaic performance of single-layer Sb2Se3 solar cells.

**
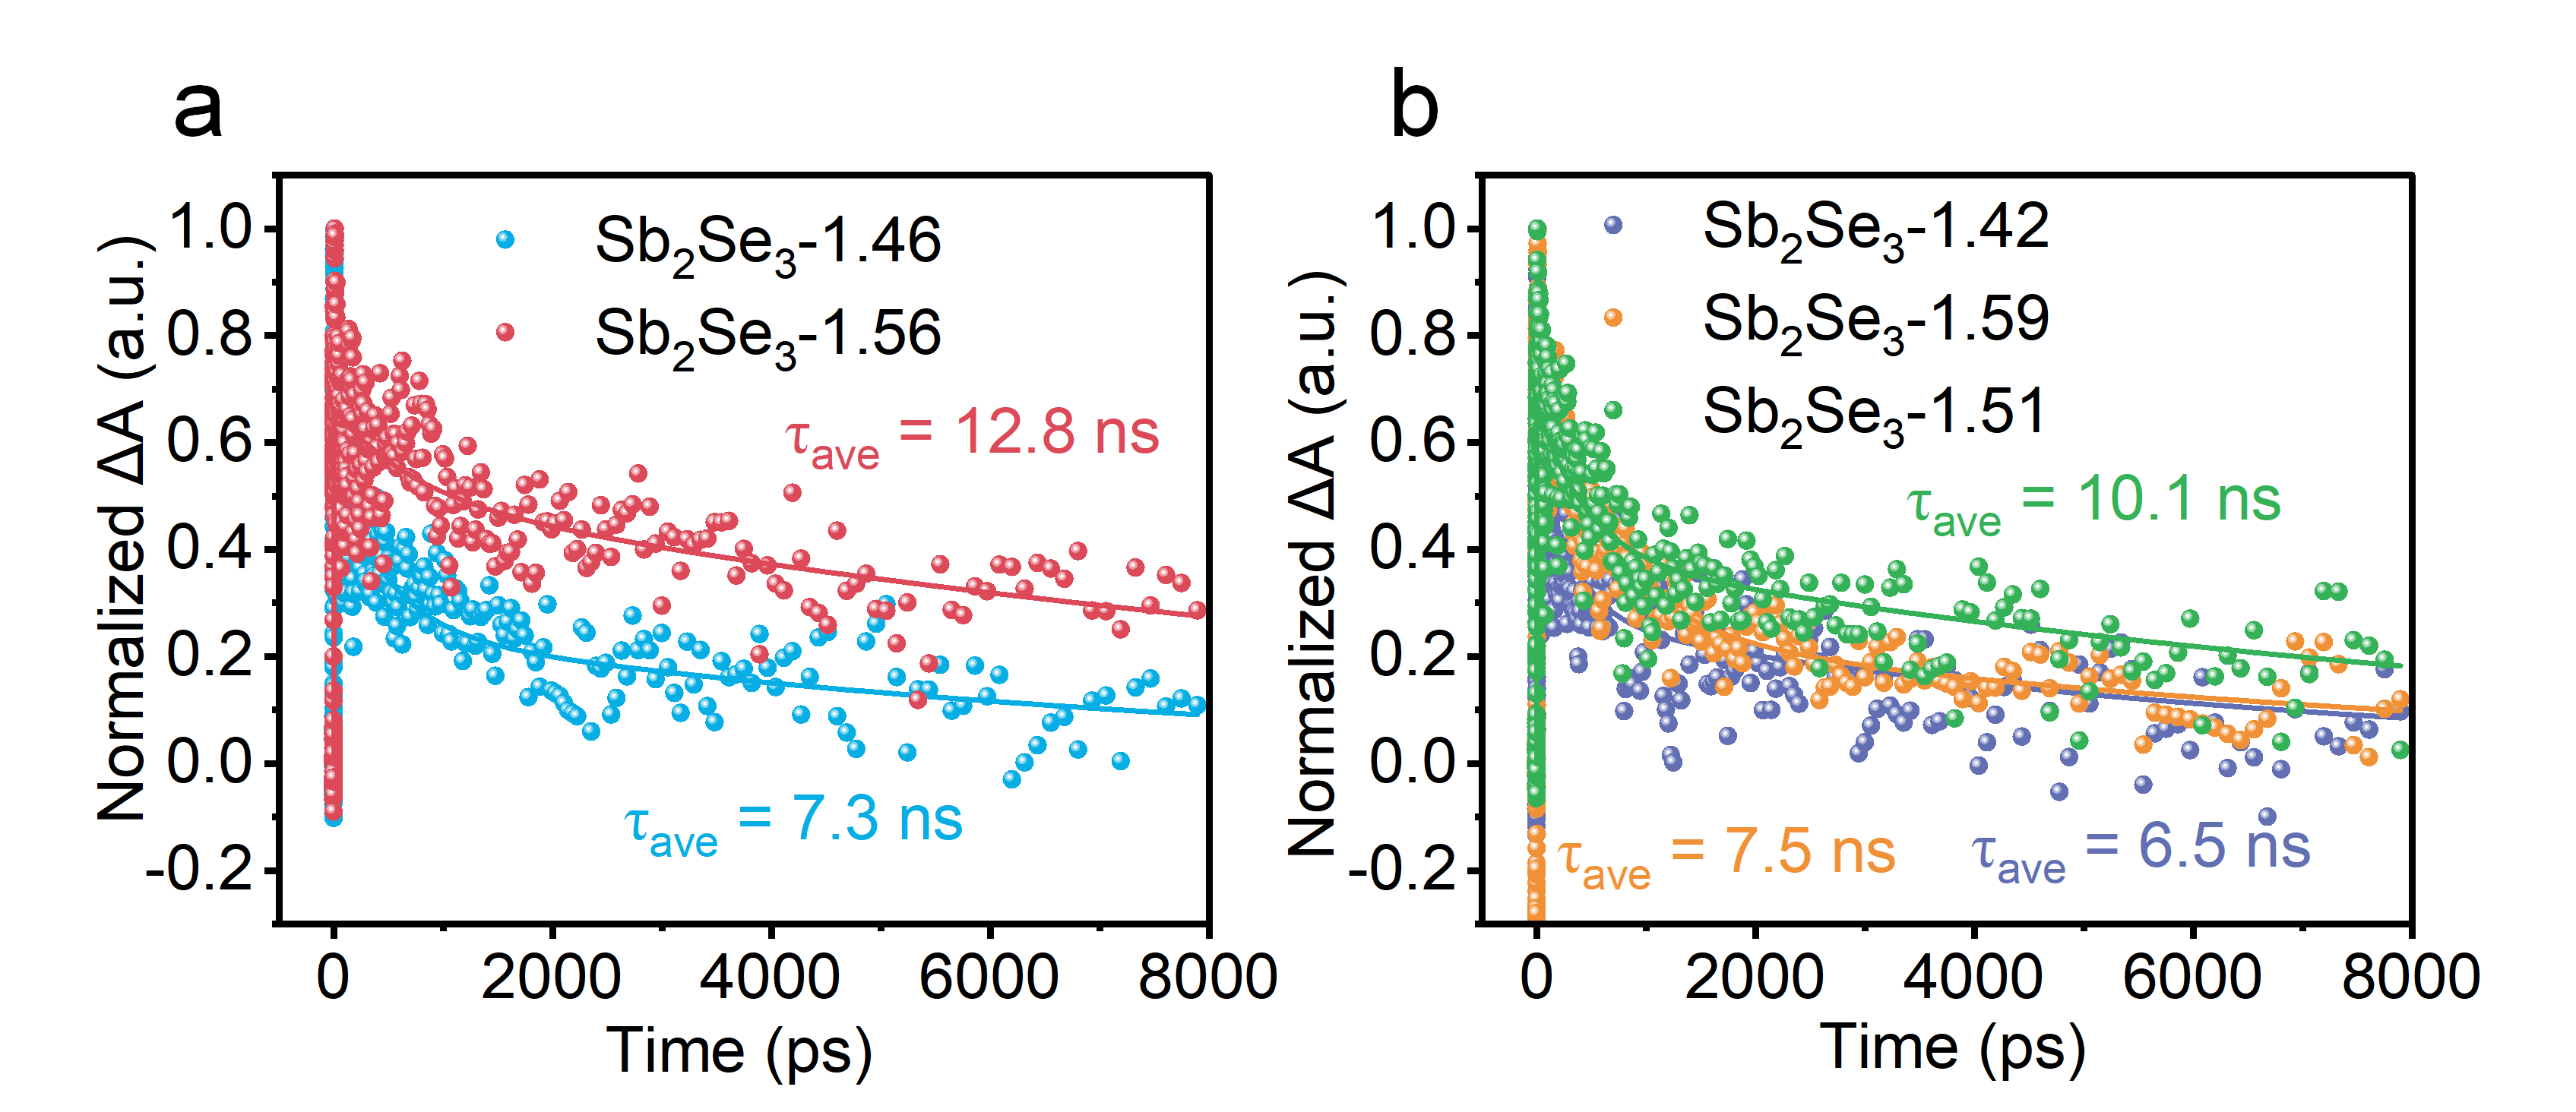
**

**Figure S10.** Normalized dynamic traces at 690 nm and the corresponding curves fitted by a double exponential equation for the Sb2Se3 films with different Se/Sb ratio on the glass.

**
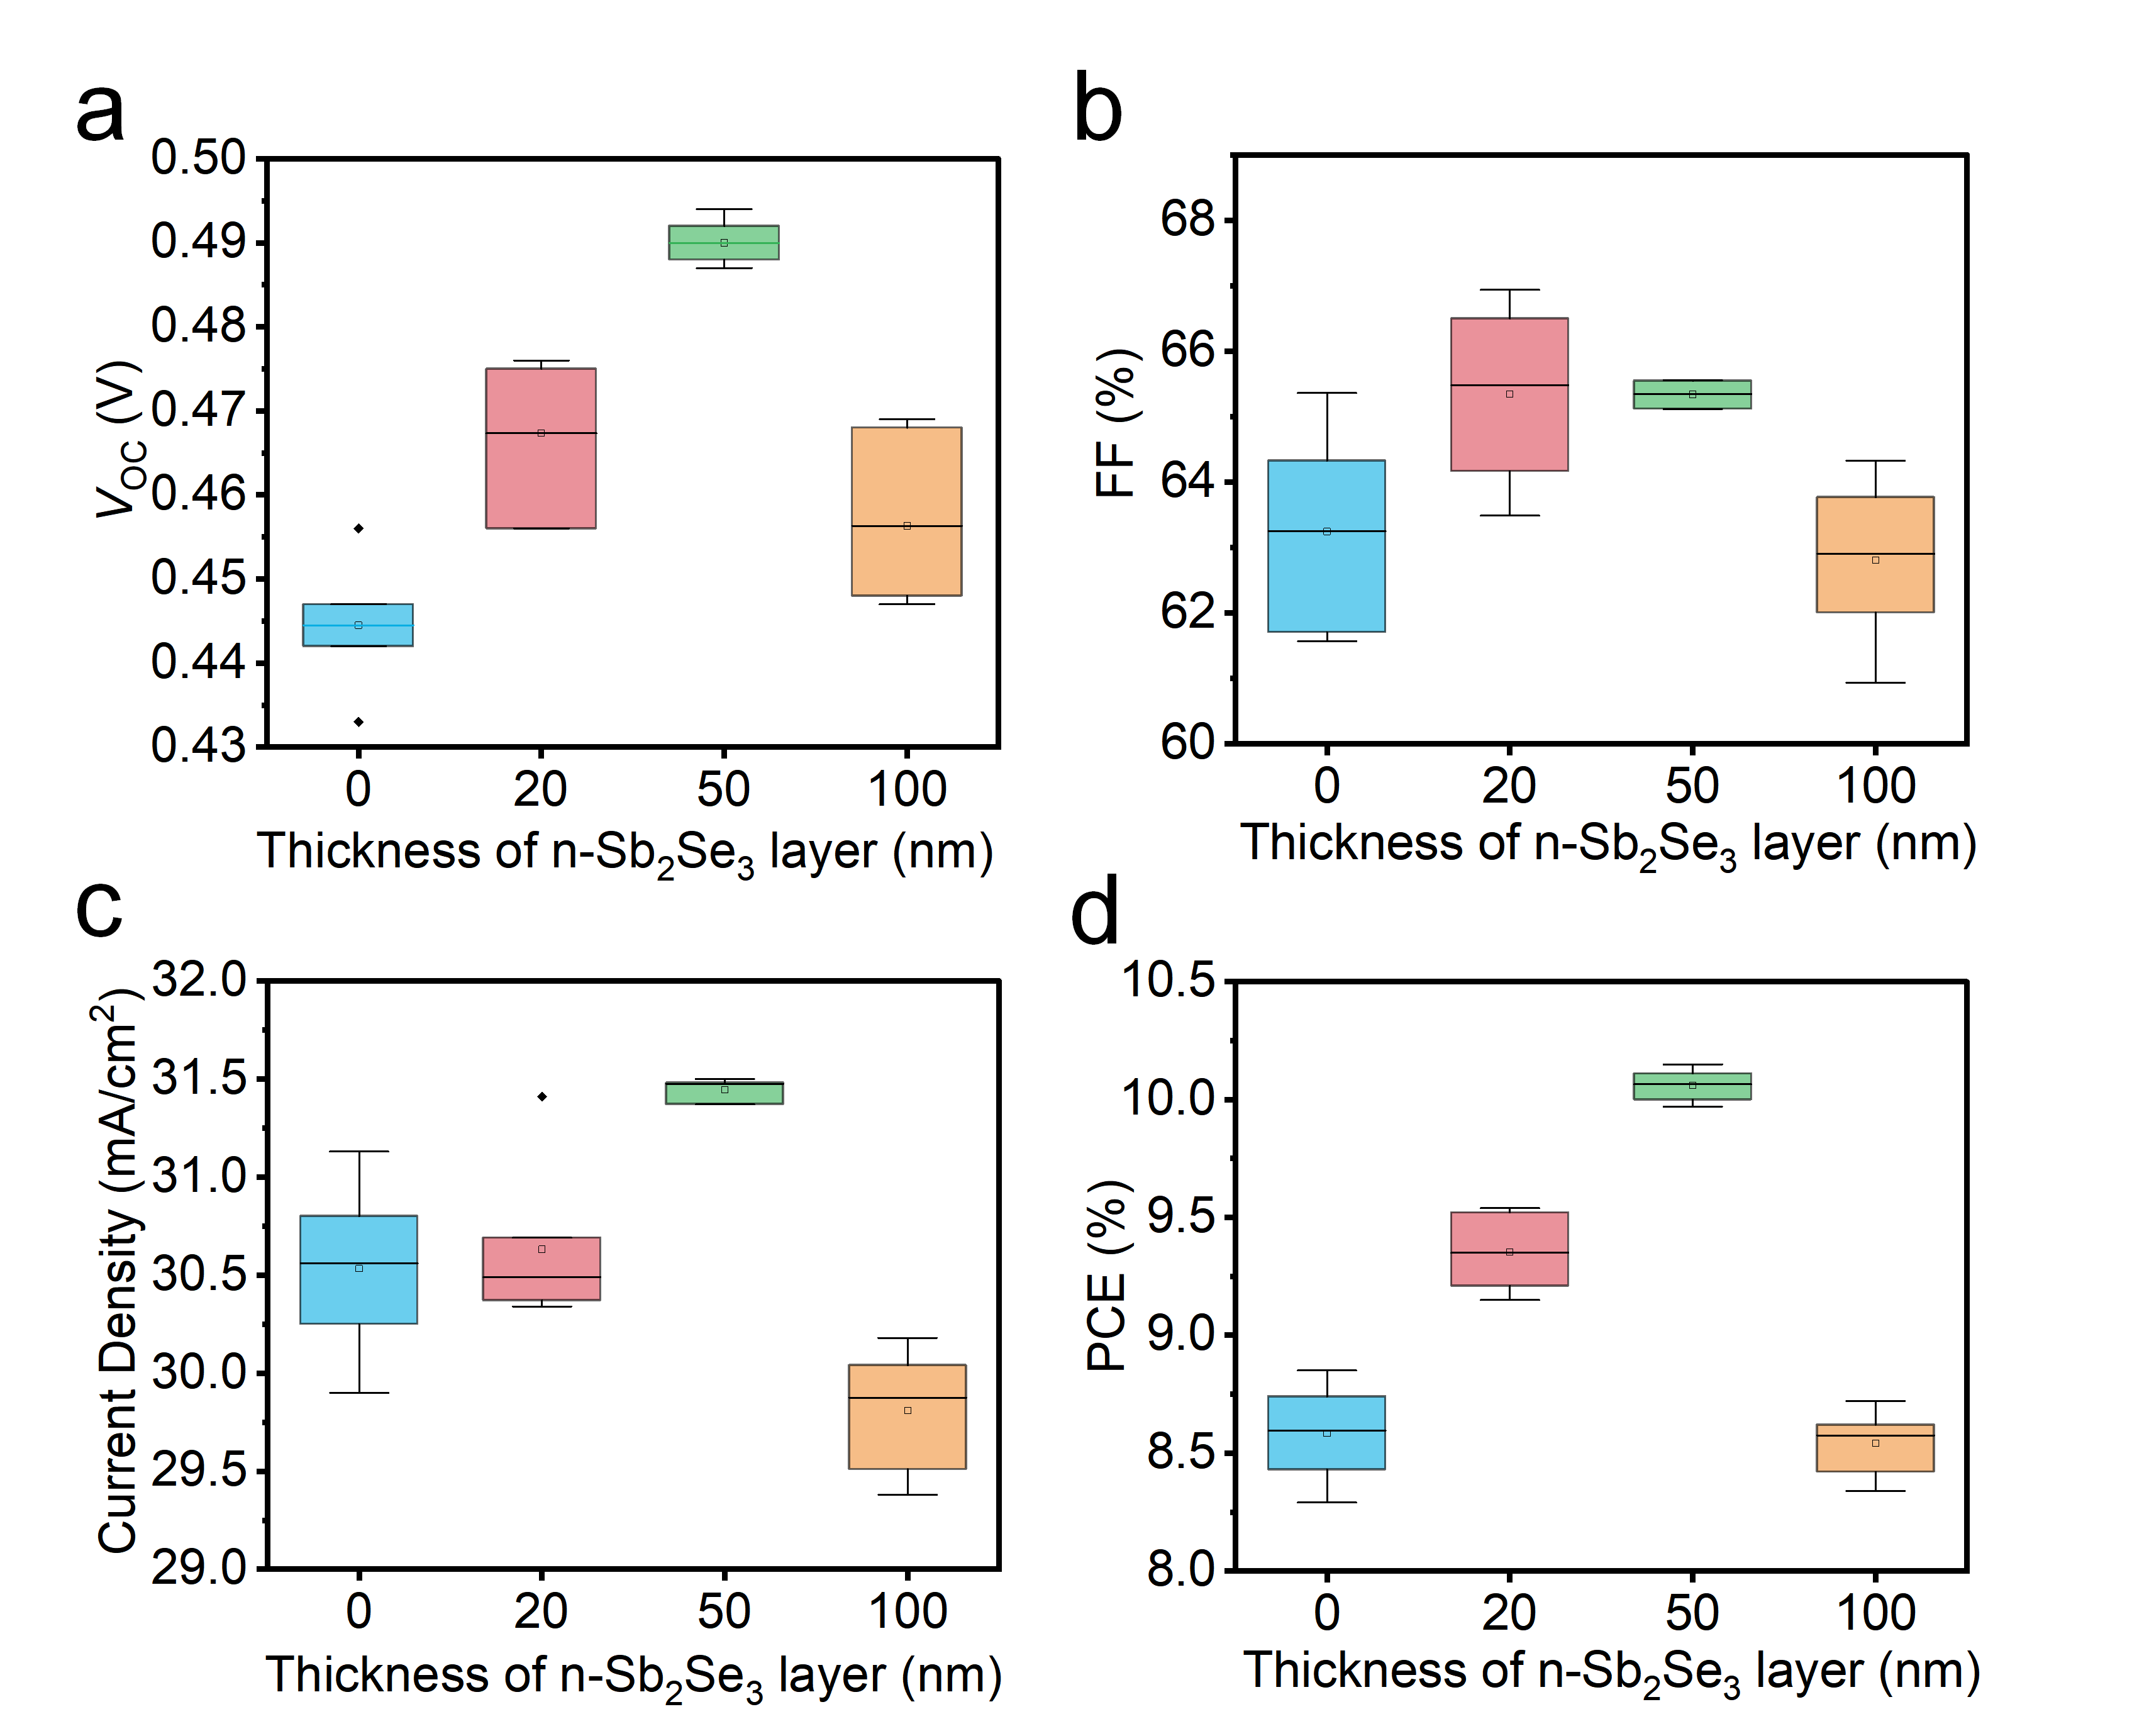
**

**Figure S11.** Effect of the thickness of n-Sb2Se3 layer on the photovoltaic performance of the homojunction Sb2Se3 solar cells. Statistics of the a) *V*OC, b) FF, c) *J*SC, and d) PCE of the devices.

**
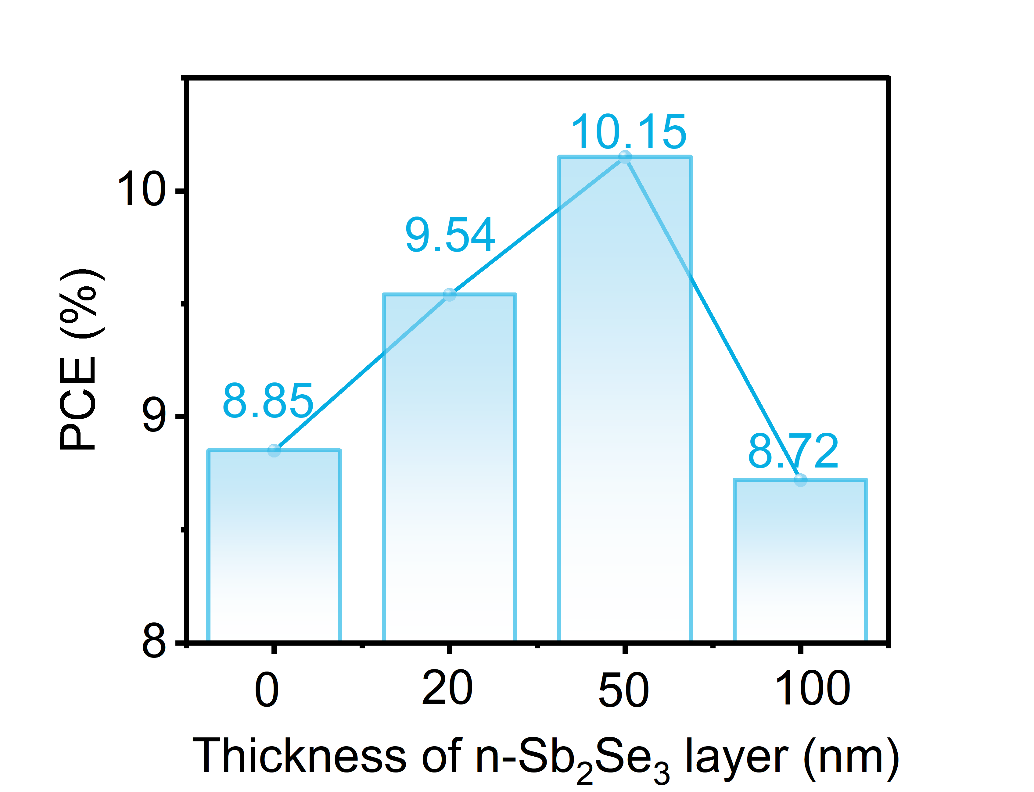
**

**Figure S12.** Effect of the thickness of n-Sb2Se3 layer on the photovoltaic performance of the homojunction Sb2Se3 solar cells.

**
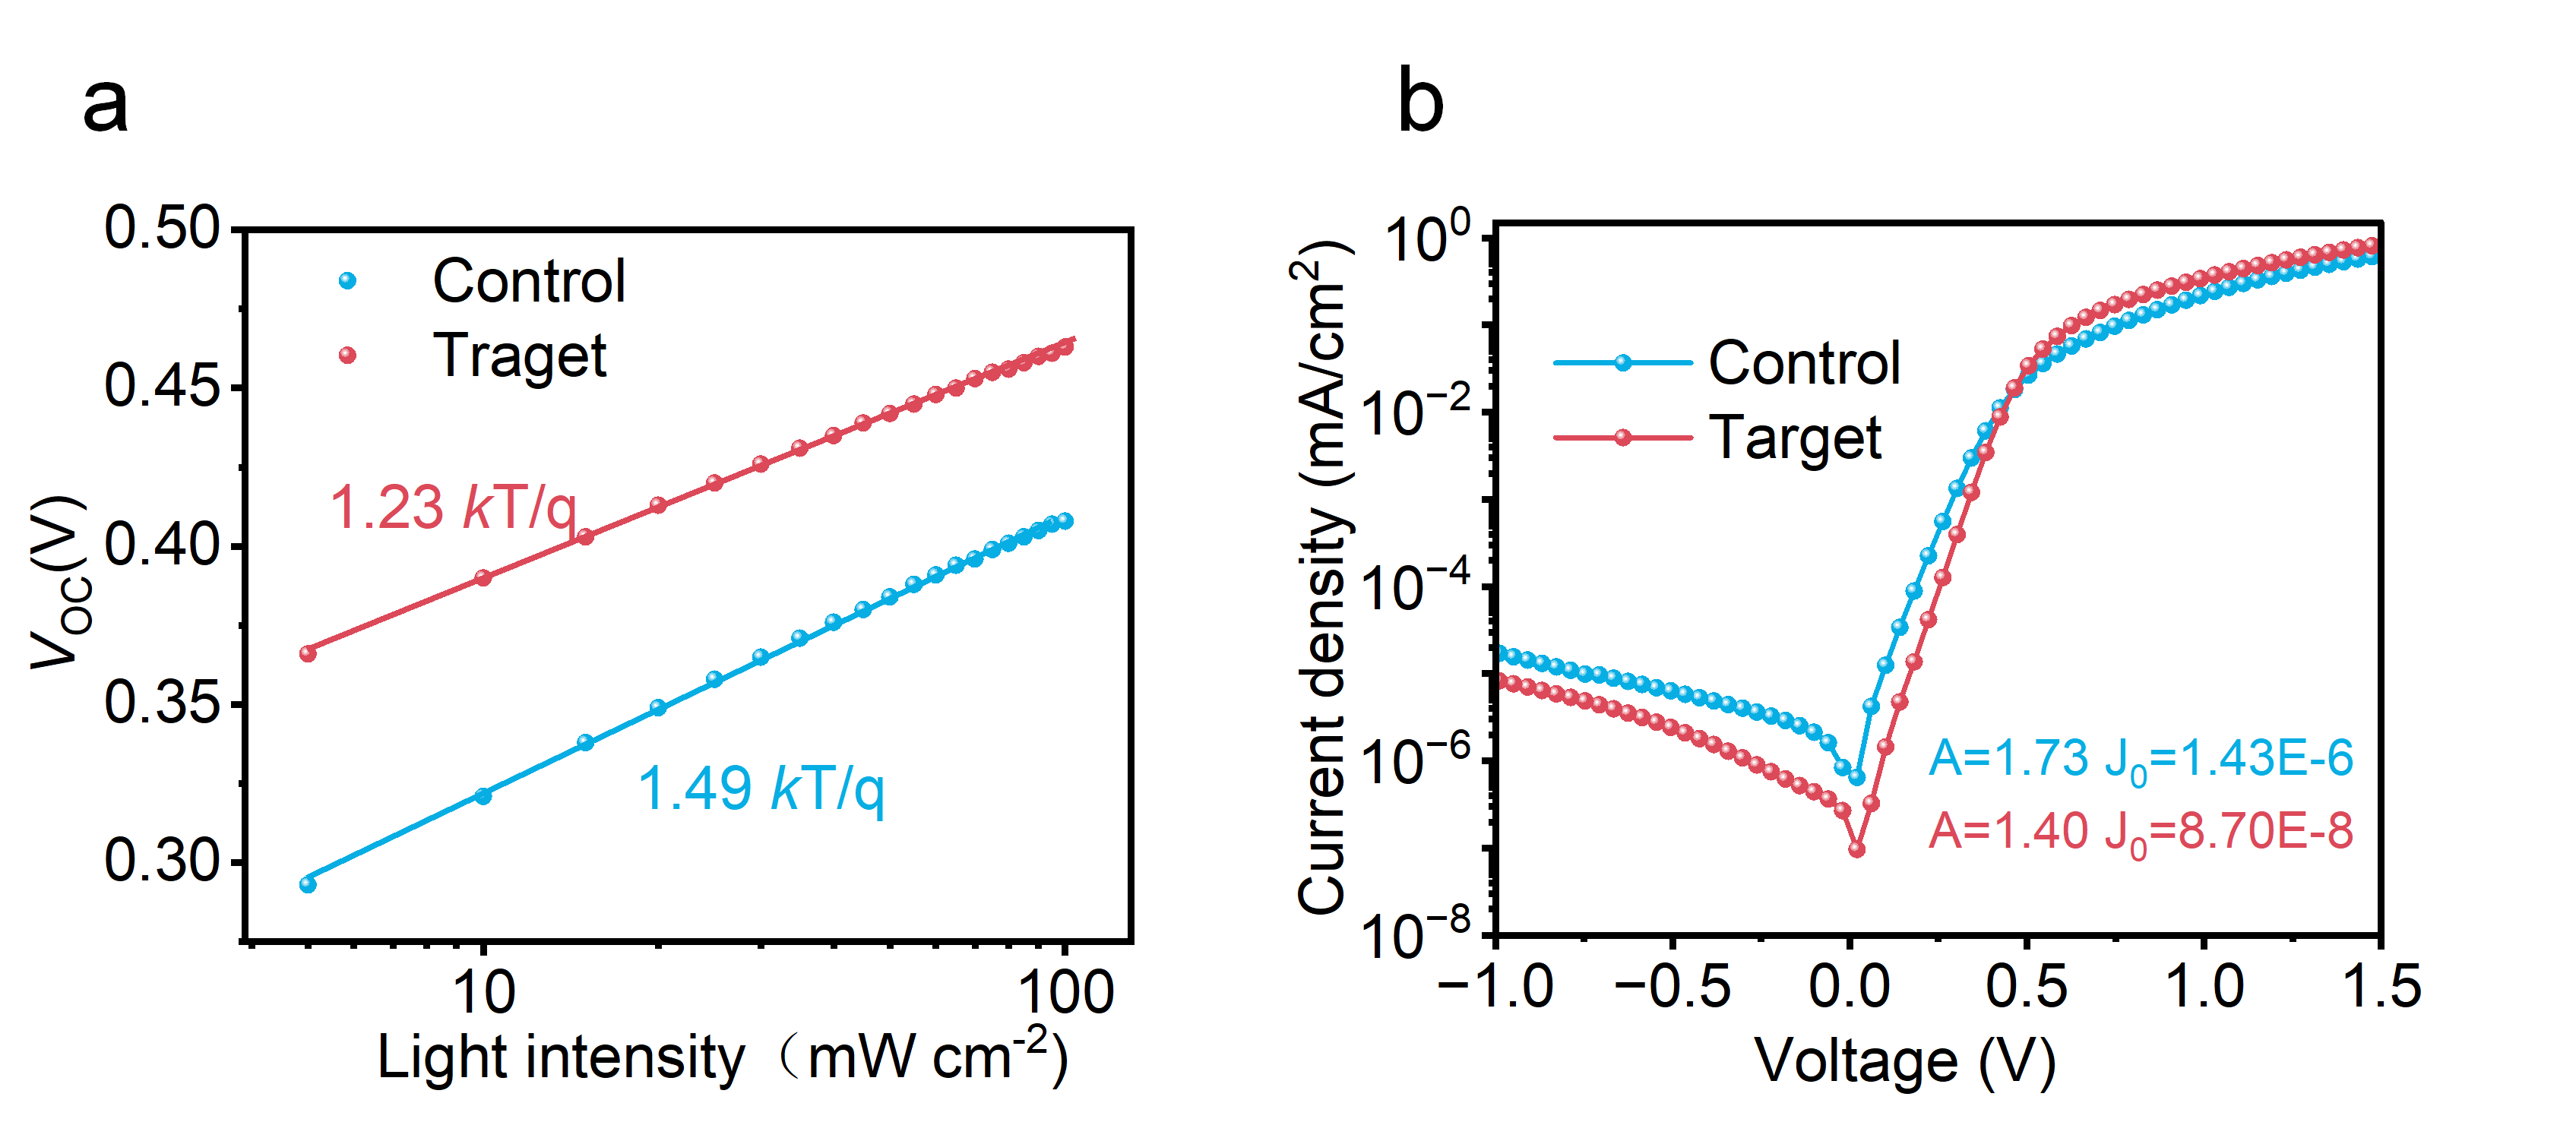
**

**Figure S13. Electrical behaviors of the Control-Sb2Se3 and Target-Sb2Se3 devices.** a) The dependence of *V*OC on different light intensity. b) Dark *J-V* curves for ideality factor A and reverse saturation current density *J*0

**
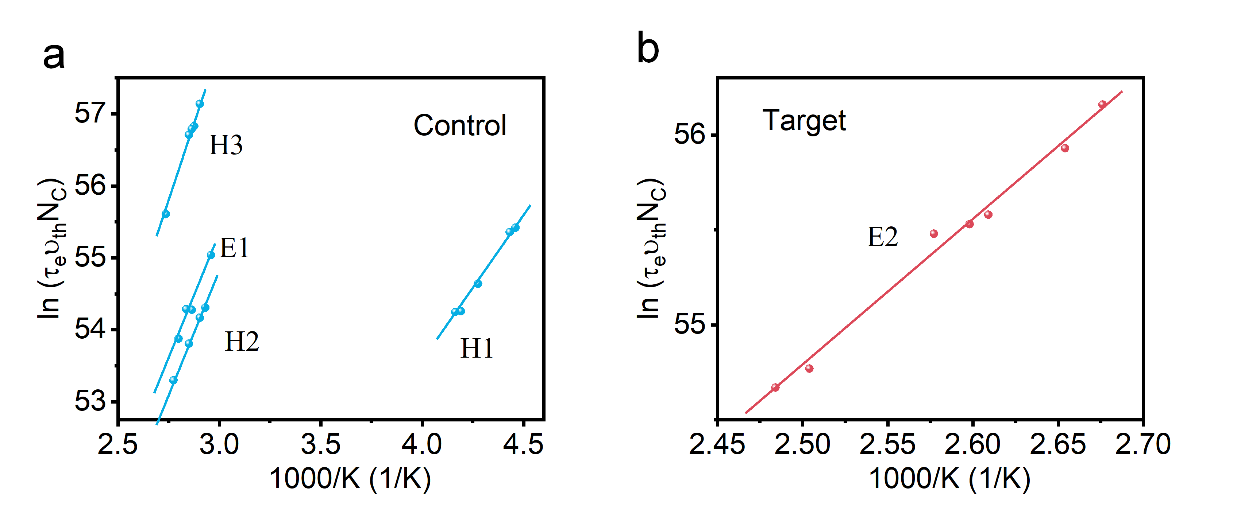
**

**Figure S14.** The corresponding Arrhenius plots are obtained from DLTS signals of the a) Control-Sb2Se3 and b) Target-Sb2Se3 devices.

**
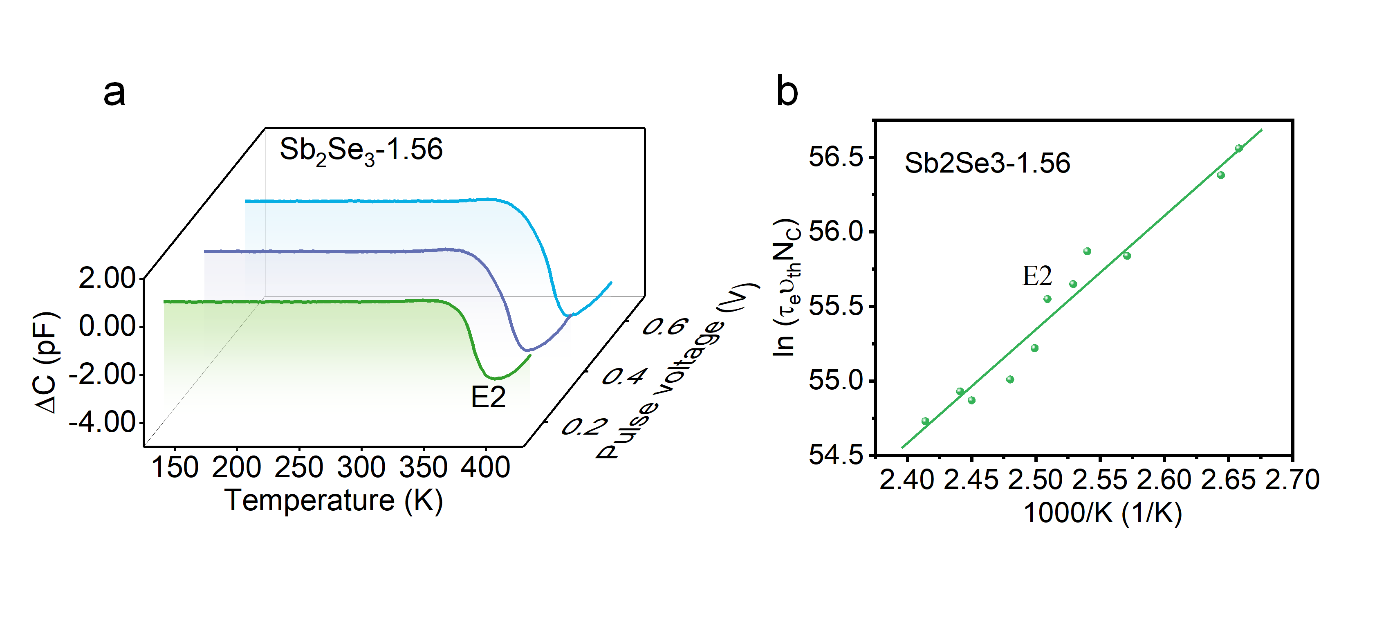
**

**Figure S15.** a) DLTS spectra for the single-layer p-type Sb2Se3 device and b) The corresponding Arrhenius plots are obtained from DLTS signals.

**
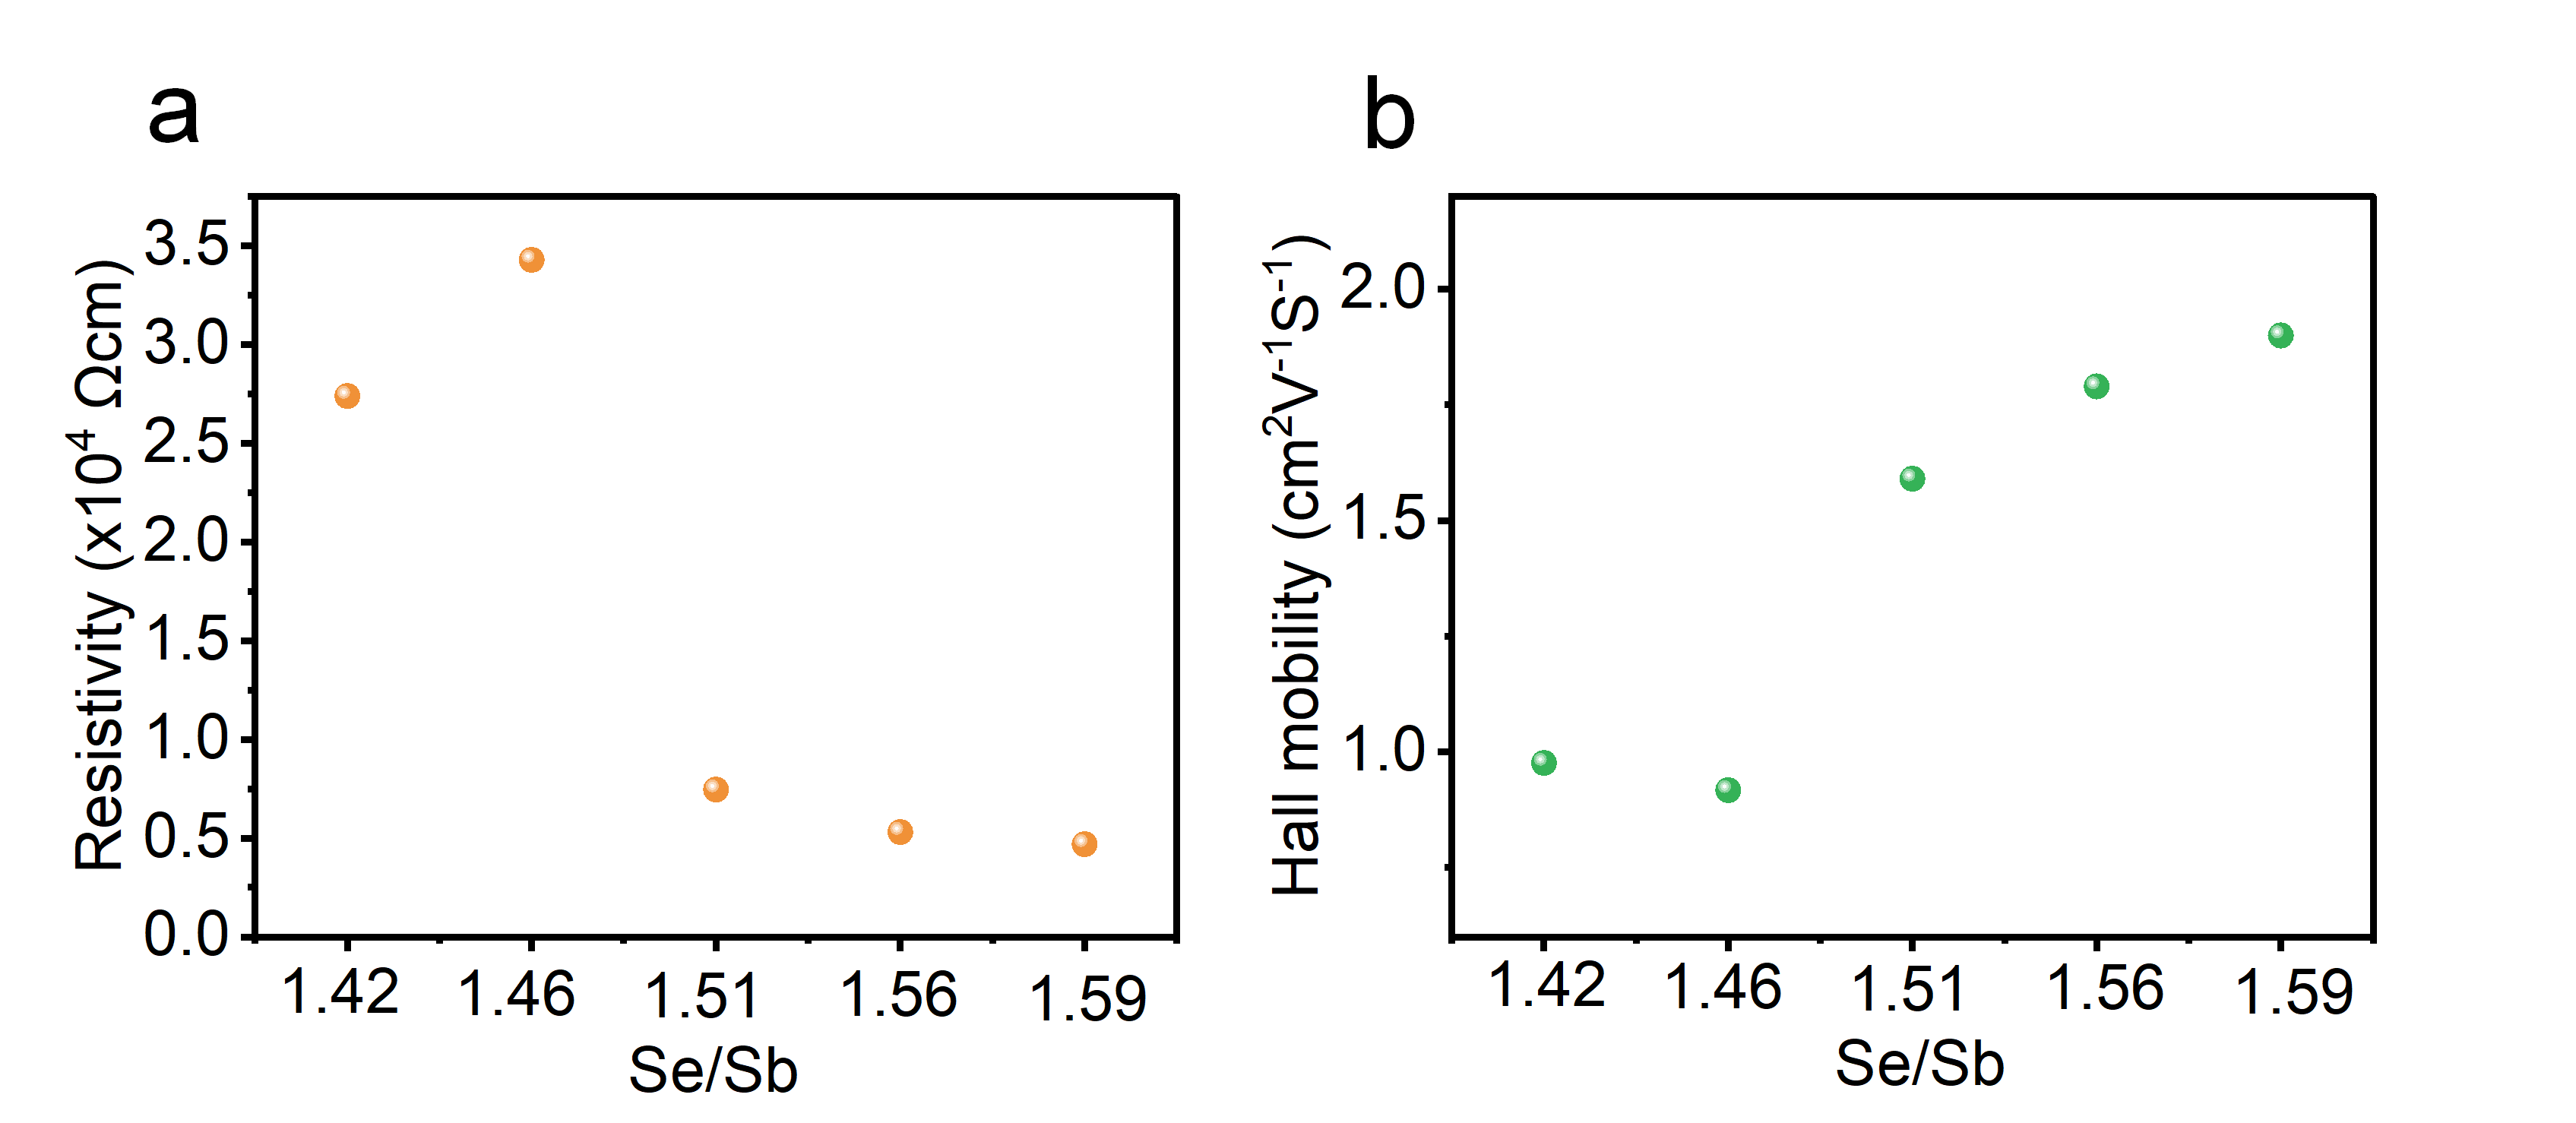
**

**Figure S16.** **Electrical properties of the Sb2Se3 films with different Se/Sb ratio**. a) resistivity and b) mobility of Sb2Se3 films with different Se/Sb ratio on the glass.

**
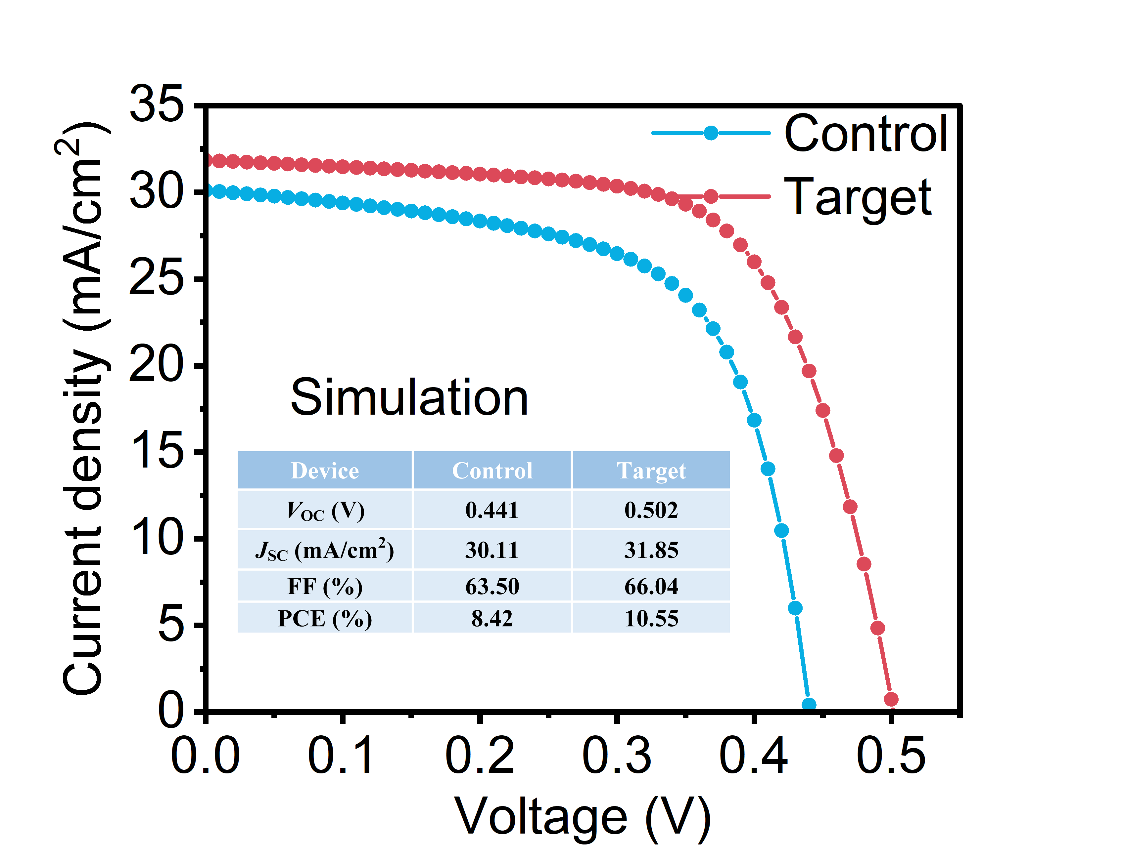
**

**Figure S17.** Simulated *J-V* curves of the Control-Sb2Se3 and Target-Sb2Se3 devices.

**
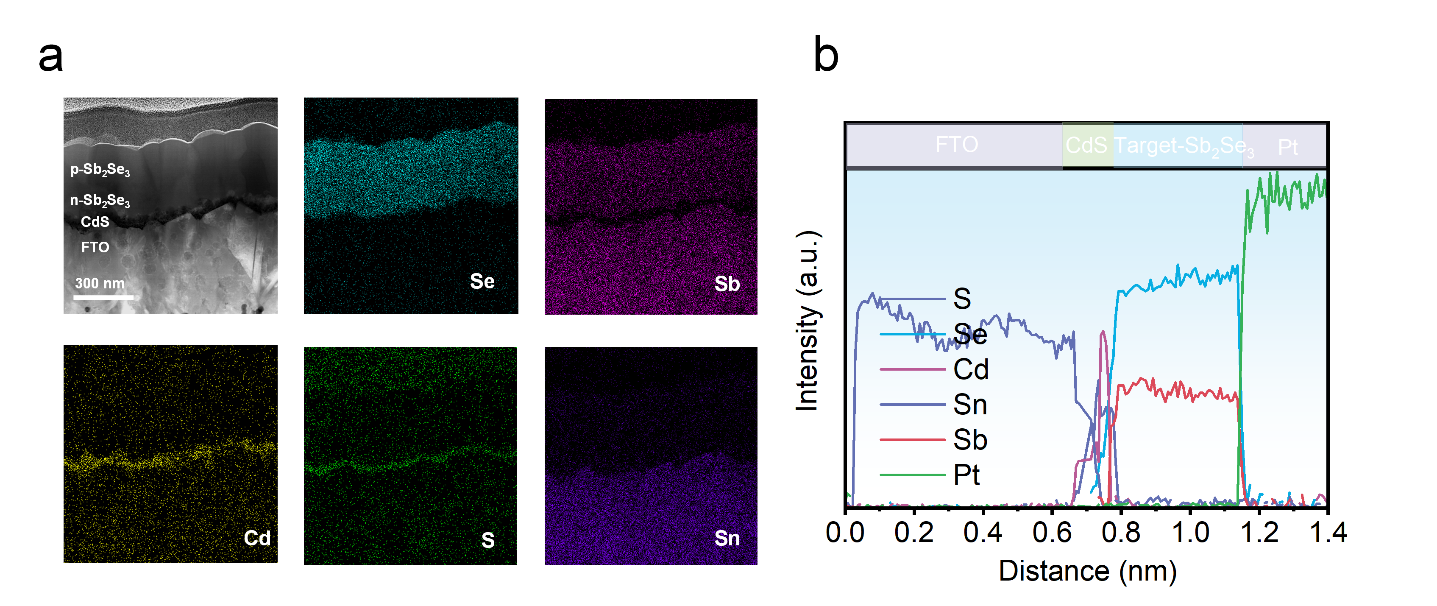
**

**Figure S18. Interface structure analysis.** a) High-resolution transmission electron microscopy images and corresponding Fourier transform (FT) images of marked regions (Regions I and II). b) TEM-EDS line scan along the depth of the Target-Sb2Se3 device.

**Table S1.** Effect of the stoichiometric ratio of Sb2Se3 on the photovoltaic performance of single-layer Sb2Se3 solar cells.

| Se/Sb | *V*OC (V) | *J*SC (mA/cm2) | FF (%) | PCE (%) |
| --- | --- | --- | --- | --- |
| 1.42 | 0.415 | 29.01 | 63.42 | 7.64 |
| 1.46 | 0.428 | 29.59 | 63.21 | 8.00 |
| 1.51 | 0.433 | 30.80 | 62.20 | 8.29 |
| 1.56 | 0.442 | 31.13 | 64.31 | 8.85 |
| 1.59 | 0.441 | 30.01 | 63.00 | 8.34 |

**Table S2.** Effect of the thickness of n-Sb2Se3 layer on the photovoltaic performance of the homojunction Sb2Se3 solar cells.

| Thickness (nm) | *V*OC (V) | *J*SC (mA/cm2) | FF (%) | PCE (%) |
| --- | --- | --- | --- | --- |
| 0 | 0.442 | 31.13 | 64.31 | 8.85 |
| 20 | 0.469 | 30.61 | 66.39 | 9.54 |
| 50 | 0.492 | 31.48 | 65.56 | 10.15 |
| 100 | 0.458 | 30.04 | 63.40 | 8.72 |

**Table S3.** The summarized PCEs of related researches on Sb2Se3 solar cells prepared by thermal evaporation method.

| Number | *V*OC (V) | FF (%) | *J*SC (mA/cm2) | PCE (%) | Year | Reference |
| --- | --- | --- | --- | --- | --- | --- |
| 1 | 0.3 | 48 | 13.2 | 1.9 | 2014 | 5 |
| 2 | 0.354 | 33.5 | 17.84 | 2.1 | 2014 | 3 |
| 3 | 0.36 | 52.5 | 25.3 | 4.8 | 2015 | 6 |
| 4 | 0.364 | 41.26 | 23.14 | 3.47 | 2016 | 7 |
| 5 | 0.427 | 58.15 | 17.11 | 4.25 | 2017 | 8 |
| 6 | 0.407 | 30 | 12.11 | 1.47 | 2018 | 9 |
| 7 | 0.339 | 49 | 20.7 | 3.5 | 2019 | 10 |
| 8 | 0.376 | 47.24 | 17.11 | 4.51 | 2019 | 11 |
| 9 | 0.38 | 59.1 | 28.1 | 6.2 | 2020 | 12 |
| 10 | 0.4 | 56 | 22.07 | 5.03 | 2021 | 13 |
| 11 | 0.38 | 56 | 20.62 | 4.43 | 2021 | 14 |
| 12 | 0.352 | 44.2 | 23.5 | 3.65 | 2021 | 15 |
| 13 | 0.38 | 58.56 | 27.2 | 6.06 | 2022 | 16 |
| 14 | 0.403 | 59.52 | 25.59 | 6.2 | 2022 | 17 |
| 15 | 0.424 | 58.579 | 27.379 | 6.89 | 2022 | 18 |
| 16 | 0.41 | 31.32 | 26.3 | 3.29 | 2023 | 19 |
| 17 | 0.324 | 43 | 25 | 3.5 | 2023 | 20 |
| 18 | 0.362 | 50.39 | 18.54 | 3.38 | 2023 | 21 |
| 19 | 0.42 | 53 | 19.75 | 4.3 | 2023 | 22 |
| 20 | 0.37 | 46.27 | 29.24 | 5 | 2023 | 23 |
| 21 | 0.367 | 56.95 | 26.44 | 5.52 | 2023 | 24 |
| 22 | 0.389 | 54.6 | 27.6 | 5.85 | 2023 | 25 |
| 23 | 0.47 | 59.41 | 29.1 | 8.22 | 2024 | 26 |
| 24 | 0.448 | 65.44 | 30.36 | 8.9 | 2024 | 27 |
| 25 | 0.47 | 64.37 | 30.74 | 9.28 | 2024 | 28 |
| 26 | 0.461 | 66.52 | 30.57 | 9.37 | 2024 | 29 |
| 27 | 0.469 | 66.72 | 30.33 | 9.5 | 2025 | 30 |
| 28 | 0.492 | 65.56 | 31.48 | 10.15 | This Work | |

**Table S4.** The chemical potentials of the elements.

| Conditions | Sb | Se |
| --- | --- | --- |
| Sb-rich *μ*i+*E*i [eV] | -4.637 | -4.556 |
| Seb-rich *μ*i+*E*i [eV] | -5.327 | -4.096 |

**Table S5**. Parameters such as free carrier densities, bulk and interface defect densities, and depletion width obtained from DLCP and C-V characterization.

| Samples | Ncv-NDLCP (cm-3) | Wd (nm) | (Ncv – NDLCP) х Wd (cm-2) |
| --- | --- | --- | --- |
| Control-Sb2Se3 | 5.24х1016 | 131 | 6.86х1011 |
| Tatget-Sb2Se3 | 2.02х1016 | 182 | 3.68х1011 |

**Table S6.** The Fitting results of TAS for the Sb2Se3 films with different Se/Sb ratio on the glass.

| Samples | A1 | τ1 (ns) | A2 | τ2 (ns) | τave (ns) |
| --- | --- | --- | --- | --- | --- |
| Glass/Sb2Se3-1.42 | 0.545 | 328 | 0.455 | 6870 | 6516.1 |
| Glass/Sb2Se3-1.46 | 0.552 | 478 | 0.448 | 7798 | 7284.0 |
| Glass/Sb2Se3-1.51 | 0.419 | 444 | 0.581 | 10400 | 10102.6 |
| Glass/Sb2Se3-1.56 | 0.239 | 721 | 0.761 | 13100 | 12889.7 |
| Glass/Sb2Se3-1.59 | 0.621 | 702 | 0.379 | 8390 | 7463.1 |

**Table S7.** Charge extraction characteristic of the FTO/CdS/Control-Sb2Se3 device and FTO/CdS/Target-Sb2Se3 device.

| Samples | A1 | τ1 (ns) | A2 | τ2 (ns) | τave (ns) |
| --- | --- | --- | --- | --- | --- |
| FTO/CdS/Control-Sb2Se3 | 0.304 | 117 | 0.696 | 4200 | 4150.9 |
| FTO/CdS/Target-Sb2Se3 | 0.277 | 68.7 | 0.723 | 1770 | 1745.1 |

**Table S8.** Summarized defect information obtained from DLTS characterizations of Control-Sb2Se3 and Target- Sb2Se3.

| Sb2Se3 | Trap | *E*T (eV) | *σ* (cm2) | *N*T (cm-3) | τ (ns) |
| --- | --- | --- | --- | --- | --- |
| Control | H1(SbSe3) | *E*V+0.364 | 1.26×10-16 | 4.78×1012 | 166035.73 |
| H2(SbSe1) | *E*V+0.548 | 3.35×10-16 | 5.93×1013 | 5033.85 |
| E1(VSe3) | *E*C−0.602 | 1.20×10-15 | 7.07×1013 | 1178.69 |
| H3(SbSe2) | *E*V+0.679 | 1.38×10-15 | 1.33×1014 | 542.87 |
| Target | E2(SeSb1) | *E*C−0.665 | 3.87×10-16 | 6.34×1013 | 4075.68 |

**Table S9.** Summarized defect information obtained from DLTS characterizations of single p-type Sb2Se3 and Target-Sb2Se3 samples.

| Sb2Se3 | Trap | *E*T (eV) | *σ* (cm2) | *N*T (cm-3) |
| --- | --- | --- | --- | --- |
| Single p-Sb2Se3 | E2(SeSb1) | *E*C−0.663 | 2.08×10-16 | 5.69×1013 |
| Target | E2(SeSb1) | *E*C−0.665 | 3.87×10-16 | 6.34×1013 |

**Supplementary Note 1:**  Micro-structure, crystallinity, and chemical composition analysis.

We probe how the homojunction engineering affect the micro-structure, crystallinity, and chemical composition properties of the Sb2Se3 films. Figure S1a, b show that both of the two kinds of films display compact and pin-hole free surface morphology. Furthermore, the two kinds of films show similar grain size which are 166 ± 7 nm and 159 ± 2 nm for Control-Sb2Se3 and Target-Sb2Se3 (Figure S1e), and the UV-Vis absorption spectra show that the bandgaps of Control-Sb2Se3 and Target-Sb2Se3 are about 1.205 and 1.202 eV, respectively (Figure S1d), indicating that the bandgap of the Sb2Se3 film is almost unchanged. X-ray diffraction (XRD) characterization is conducted to investigate the crystal structure of the films. Except for the diffraction peaks at 26.61°, 33.88°, 37.95°, and 51.78° belonging to the glass/FTO substrate (JCPDS 41-1445) are detected for both Control-Sb2Se3 and Target-Sb2Se3 films (Figure S1e), all other peaks can be assigned to orthorhombic Sb2Se3 (JCPDS 15-0861), and no impurity peaks are identified. The texture coefficient (*TC*) of the diffraction peaks of these samples is estimated (Figure S1f, the specific calculation process is provided in Note S1). As shown in Figure S1f, the homojunction engineering leads to a decrease in *TC*(hk0) and an increase in *TC*(hk1) of the Sb2Se3 samples, which is consistent with previous reports that the introduction of additional Se promotes the [hk1] orientation of Sb2Se3 films.1 The variation of TC indicates that the introduction of homojunction facilitates the growth of [hk1]-oriented Sb2Se3 thin film, providing the possibility for efficient carrier transport.

X-ray photoelectron spectra (XPS) are used to investigate the change of surface chemical properties of Sb2Se3. From Figure 1g, peaks centered at high binding energy of 539.6 and 530.2 eV are ascribed to Sb 3*d*3/2 and Sb 3*d*5/2 of Sb2Se3.2,3 Two peaks at 55.9 and 55.05 eV (Figure 1h), corresponding to Se 3d3/2 and Se 3d5/2 of Sb2Se3,4 respectively. From the XPS spectra of Control-Sb2Se3 and Target-Sb2Se3, there is no obvious peak shifts or new peaks appear. We further analyzed the chemical composition of the film and found that the Se content in the p-type layer on the surface of the Target-Sb2Se3 film was higher than that of the Control- Sb2Se3, and the Se/Sb ratio also increased from 1.42 to 1.56, indicating that the surface of the Control-Sb2Se3 film is enriched in antimony and the surface of the Target-Sb2Se3 film is enriched in selenium. Since XPS can only test information within a few nanometers of the surface depth, we used cross-sectional EDS to confirm the changes in the elemental composition of Control- Sb2Se3 and Target- Sb2Se3. As shown in Figure S1, in order to avoid errors, we selected nine points for testing. The Se/Sb in the n-type layer of the Control-Sb2Se3 sample and the Target-Sb2Se3 was 1.46, while the Se/Sb in the p-type layer of the Target-Sb2Se3 was 1.56. In addition, inductively coupled plasma atomic emission spectroscopy (ICP-AES) was also used to more accurately test the element content in the samples. As shown in Figure S2, the test results showed that the Se/Sb of Control-Sb2Se3 was 1.45, while the Se/Sb in the p-type layer of Target-Sb2Se3 was 1.57, which was consistent with the results of XPS and EDS. To further elucidate the elemental depth profile, we analyzed the SIMS spectra (Figure S4 a, b). In the Control‑Sb₂Se₃ sample, both Sb and Se signals remain essentially constant through the entire absorber thickness, indicating no significant gradient. By contrast, the Target‑Sb2Se3 profile shows a lower Se/Sb ratio near the CdS interface that steadily rises as the sputtering approaches the film surface, confirming selenium enrichment at the exterior of the film. Together, these multi‐scale measurements unambiguously demonstrate that our precursor‐composition strategy successfully drives Se/Sb variations in the film, thereby realizing the targeted composition‑driven homojunction structure.

**Supplementary Note 2: First-principles calculations.**

In order to study the properties of defects in Sb2Se3, we calculated the formation enthalpy Δ*Hf* (*α*,*q*) for a specific point defect at different charge states q, which is a function of the elemental chemical potential *μ*i (i means the component elements) and Fermi energy, using the supercell model following **Equation (1)**:

(1)

Where *E*(*α, q*) is the calculated total energy of supercell with a defect α in the charge state *q* and *E* (perfect)is the total energy of pure Sb2Se3 supercell. *N*i is the atomic number of the element we added into (*p*i was positive) or removed from (*n*i is negative) from the supercell. *E*i is the atomic energy of the element i in its elemental phase and *μ*i is the chemical potential of the element i. *E*VBM is the VBM level of the perfect supercell. *E*F is the Fermi level referenced to VBM and with the Fermi level shift between the VBM and CBM (*E*F changes from zero to the value of bandgap). Furthermore, transition energy levels *εeq* = *q*0*T* can be calculated as the Fermi level *E*F at which the defect *α* in the charge state *q* has the same formation energy as in the charge state *q*0.[10] It can also be expressed as **Equation (2)**:

(2)

Since the sample was synthesized under Sb-rich and Se-rich conditions, we confirmed the values of chemical potential as tabulated in the **Table S4**. Our calculations were carried out based on the density functional theory (DFT) as implemented in the Vienna Ab initio Simulation Package (VASP).31,32 GGA of Perdew-Burke Ernzerhof (PBE) was used to relax the structural parameters.33 For the exchange correlation function, the hybrid function in the Heyd-Scuseria-Ernzerhof (HSE) form, with a fraction of Hartree-Fork exchange was used for static calculation of the electronic structure and total energy. This kind of mixing method was used in calculating the defect properties of this material system and it is proved efficient in some previous work. All the calculations were done with a 360 eV cut off kinetic energy for the plane-wave basis wavefunctions. Structural relaxation and density of states were calculated using 3×9×3 Gamma k-point meshes within the 20 atoms in one cell and all the atoms were fully relaxed until the atomic forces are less than 0.03eV Å-1. The defects and dopants calculations were performed using a 240 atoms supercell with only one Gamma k-point to ensure the occupancy of the defect levels. Considering the existence of van der Waals bonds in Sb2Se3, vdW-optB86 functional was used in the whole process of structural relaxation.34

**Supplementary Note 4: Texture coefficient calculations**

The texture coefficient of the filmsis calculated by the following equation:

Where *TC*(hk1) is the texture coefficient of (hkl) planes, I(hkl) is the measured intensity of the XRD peaks, I0(hkl) represents the standard intensity of the (hkl) planes, and n is the number of XRD peaks involved in the calculation.

**Supplementary Note 5: Background of DLTS measurement**

Deep-level transient spectroscopy (DLTS) was conducted to investigate the defect properties. The activation energy (*E*a) as well as capture cross-section (*σ*) of defects can be calculated from Arrhenius plots based on the following equations:

where *τ*e represents the emission time constant, *υ*th,p and *υ*th,n are the thermal velocities associated with hole and electron traps, *N*C and *N*V are the effective densities of states of conduction (*E*C) and valence (*E*V) bands, *X*p and *X*n are the entropy factor of hole and electron, σp and σn represent the capture cross-section of hole and electron traps, respectively. *T*, *k*B, and *E*T are the temperature, Boltzmann constant, and energy level of the defect, respectively.

**References**

1. Zhang, C. *et al.* Mechanism of Defect Passivation in Sb2Se3 Solar Cells via Buried Selenium Seed Layer. *Adv. Energy Mater.***15**, 2403352 (2024).

2. Kim, S.-K., You, H.-K., Yun, K.-R., Kim, J.-H. & Seong, T.-Y. Fabrication of High-Responsivity Sb2Se3-Based Photodetectors through Selenization Process. *Advanced Optical Materials* **11**, 2202625 (2023).

3. Liu, X. *et al.* Thermal Evaporation and Characterization of Sb2Se3 Thin Film for Substrate Sb2Se3/CdS Solar Cells. *ACS Appl. Mater. Interfaces* **6**, 10687–10695 (2014).

4. Yu, P., Yu, X., Kong, Y., Sun, L. & Jiang, Y. Sb2Se3 Microbelt/PEDOT Heterojunction for a Self-Powered Visible to Near-Infrared Photodetector with High Polarization-Sensitive Imaging. *ACS Appl. Electron. Mater.* **7**, 1684–1693 (2025).

5. Luo, M. *et al.* Thermal evaporation and characterization of superstrate CdS/Sb2Se3 solar cells. *Appl. Phys. Lett.* **104**, 173904 (2014).

6. Liu, X. *et al.* Improving the performance of Sb2Se3 thin film solar cells over 4% by controlled addition of oxygen during film deposition. *Progress in Photovoltaics: Research and Applications* **23**, 1828–1836 (2015).

7. Li, Z. *et al.* Efficiency enhancement of Sb2Se3 thin-film solar cells by the co-evaporation of Se and Sb2Se3. *Appl. Phys. Express* **9**, 052302 (2016).

8. Li, Z. *et al.* Sb2Se3 thin film solar cells in substrate configuration and the back contact selenization. *Solar Energy Materials and Solar Cells* **161**, 190–196 (2017).

9. Lee, D., Cho, J. Y. & Heo, J. Improved efficiency of Sb2Se3/CdS thin-film solar cells: The effect of low-temperature pre-annealing of the absorbers. *Solar Energy* **173**, 1073–1079 (2018).

10. Kumar, V. *et al.* Effects of post-deposition annealing and copper inclusion in superstrate Sb2Se3 based solar cells by thermal evaporation. *Solar Energy* **193**, 452–457 (2019).

11. Park, S.-N. *et al.* Controlled synthesis of (hk1) preferentially oriented Sb2Se3 rod arrays by co-evaporation for photovoltaic applications. *J. Mater. Chem. A* **7**, 25900–25907 (2019).

12. Yao, S. *et al.* Improved Performance of Thermally Evaporated Sb2Se3 Thin-Film Solar Cells via Substrate-Cooling-Speed Control and Hydrogen-Sulfide Treatment. *ACS Appl. Mater. Interfaces* **12**, 24112–24124 (2020).

13. Cheng, C.-H. *et al.* Enhanced Performance of the Sb2Se3 Thin-Film Solar Cell by Organic Molecule-Induced Crystallization and Suppression of the Interface Recombination. *ACS Appl. Energy Mater.* **4**, 5079–5085 (2021).

14. Li, W.-H. *et al.* Enhanced performance of antimony selenide thin film solar cell using PbI2 as a dopant. *Applied Physics Letters* **118**, 093903 (2021).

15. Kumar, V. *et al.* Analysis of Se Co-evaporation and Post-selenization for Sb2Se3-Based Solar Cells. *ACS Appl. Energy Mater.* **4**, 12479–12486 (2021).

16. Wang, Y. *et al.* Post-Treatment of TiO2 Film Enables High-Quality Sb2Se3 Film Deposition for Solar Cell Applications. *ACS Appl. Mater. Interfaces* **14**, 33181–33190 (2022).

17. Cao, R. *et al.* Revealing the chemical structure-dependent carrier trapping in one-dimensional antimony selenide photovoltaic materials. *J. Mater. Chem. A* **10**, 20482–20488 (2022).

18. Cai, H. *et al.* Interfacial Engineering towards Enhanced Photovoltaic Performance of Sb2Se3 Solar Cell. *Adv. Funct. Mater.* **32**, 2208243 (2022).

19. Zhong, Y.-M. *et al.* Thermal diffused post-selenization for enhancing the photovoltaic performance of thermally evaporated Sb2Se3 solar cell. *Ceramics International* **49**, 36935–36941 (2023).

20. Torabi, N. *et al.* Analysis of CdSe as an alternative buffer layer for Sb2Se3 solar cells. *Solar Energy* **264**, 111990 (2023).

21. Jain, A. K., Anandan, R. & Malar, P. Study of thermally evaporated Sb2Se3-based substrate-configured solar cell. *Mater. Res. Express* **10**, 105502 (2023).

22. Hu, Y. *et al.* Enhanced efficiency of the Sb2Se3 thin-film solar cell by the anode passivation using an organic small molecular of TCTA. *J. Semicond.* **44**, 082701 (2023).

23. Dong, Y. et al. Zinc Chloride‐Treated Indium Sulfide as Buffer Layer for Cd‐Free Antimony Selenide Solar Cells. *Sol. RRL* **7**, 2300440 (2023)

24. Huang, L. *et al.* InCl3-modified SnO2 as an electron transporting layer for Cd-free antimony selenide solar cells. *J. Mater. Chem. A* **11**, 16963–16972 (2023).

25. Gao, J. Single-source thermal evaporation converts anion controllable Sb2(S,Se)3 film for fabricating high-efficiency solar cell. Science China Materials **66**, 3415–3423 (2023).

26. Zhao, Q. *et al.* Crystal reconstruction and defect healing enabled high-quality Sb2Se3 films for solar cell applications. *J. Mater. Chem. A* **12**, 11524–11534 (2024).

27. Cai, Z. *et al.* Active Passivation of Anion Vacancies in Antimony Selenide Film for Efficient Solar Cells. *Adv. Mater.* **36**, 2404826 (2024).

28. Zhao, Q. *et al.* Grain‐Boundary Elimination via Liquid Medium Annealing toward High‐Efficiency Sb2Se3 Solar Cells. *Adv. Mater.* **37**, 2414082 (2025).

29. Sheng, S. *et al.* Boron Trioxide‐Assisted Post‐Annealing Enables Vertical Oriented Recrystallization of Sb2Se3 Thin Film for High‐Efficiency Solar Cells. *Advanced Materials* **37**, 2416083 (2025).

30. Che, B. *et al.* Post-deposition Treatment of Sb2Se3 Enables Defect Passivation and Increased Carrier Transport Dimension for Efficient Solar Cell Application. *Angew. Chem. Int. Ed.* **64**, e202425639 (2025).

31. Kresse, G. & Hafner, J. Ab initio molecular dynamics for liquid metals. *Phys. Rev. B* **47**, 558–561 (1993).

32. Kresse, G. & Furthmüller, J. Efficient iterative schemes for ab initio total-energy calculations using a plane-wave basis set. *Phys. Rev. B* **54**, 11169–11186 (1996).

33. Perdew, J. P., Burke, K. & Ernzerhof, M. Generalized Gradient Approximation Made Simple. *Phys. Rev. Lett.* **77**, 3865–3868 (1996).

34. Klimeš, J., Bowler, D. R. & Michaelides, A. Van der Waals density functionals applied to solids. *Phys. Rev. B* **83**, 195131 (2011).
